# Supplementary material for: JMJD6 Is a Druggable Oxygenase That Regulates AR-V7 Expression in Prostate Cancer
Source: Oxford University Press journal article supplement (doi:10.1158/0008-5472.can-20-1807), 2021-02-15
Supplement: can-20-1807_supp_tables.docx [file can-20-1807_supp_tables.docx]

**Supplementary tables**

| **Cell line** | **Supplier** | **Catalogue number** | **Media** | **Serum** |
| --- | --- | --- | --- | --- |
| 22Rv1 | ATCC | CRL-2505 | RMPI | FBS |
| VCaP | ATCC | CRL-2876 | DMEM | FBS |
| LNCaP | ATCC | CRL-1740 | RMPIR | FBS |
| LNCaP95 | Dr Meeker/Dr Luo* | NA | RMPIW | CSS |
| PNT2 | Sigma-Aldrich | 95012613 | RPMI | FBS |

**Supplementary Table 1: Cell lines and culture conditions.** ATCC – American type culture collection; FBS – fetal bovine serum; CSS – charcoal stripped serum; * - LNCaP95 cells were kindly provided by Drs. Alan K Meeker and Jun Luo (Johns Hopkins University, Baltimore, Maryland, USA); R – with phenol red; W – phenolred free.

| **Gene target** | **Supplier** | **Catalogue ID** |
| --- | --- | --- |
| Control | Dharmacon (GE healthcare) | D-001810-10 |
| JMJD6 | L-010363 |
| U2AF2 | L-012380 |

**Supplementary Table 2: ON-TARGETplus siRNA pools utilized.**

| **Protein target** | **Supplier** | **Catalogue ID** |
| --- | --- | --- |
| AR-FL | DAKO | M3562 |
| AR-V7 | Precision | AG100008 |
| JMJD6 | Santa Cruz | sc-28348 |
| GAPDH | Millipore | MAB374 |
| Tubulin | Millipore | 05-829 |
| U2AF65 | Santa Cruz | sc-53942 |

**Supplementary Table 3: Primary antibodies for western blot analysis.**

| **Gene target** | **Supplier** | **Assay ID** |
| --- | --- | --- |
| JMJD6 | ThermoFisher Scientific | Hs00397095_m1 |
| AR | Hs00171172_m1 |
| AR-V7 | Hs04260217_m1 |
| GAPDH | Hs02786624_g1 |
| B2M | Hs00187842_m1 |
| CDC73 | Hs00363810_m1 |

**Supplementary Table 4: TaqMan probes for qRT-PCR analysis.**

| **P1F:** | 5’-AGGGATGACTCTGGGAGGTAA-3’ |
| --- | --- |
| **P1R:** | 5’-CTATGAAAGGGTCAGCCTGTC-3’ |
| **P2F:** | 5’-ACCTCCCCAACTTTACATGCT-3’ |
| **P2R:** | 5’-CAGGGTCTGGTCATTTTGAGA-3’ |
| **P3F:** | 5’-GGTTTAGCAGGTATTTGGGATG-3’ |
| **P3R:** | 5’-TTCTGGGTTGTCTCCTCAGTG-3’ |

**Supplementary Table 5: RNA immunoprecipitation assay primers (AR-V7 specific splice sites).** F = forward primer, R = reverse primer.P1; contains the 5’ splice site for both AR and AR-V7, P2; contains the 3’ splice site for AR-V7, P3; contains the 3’ splice site for AR.


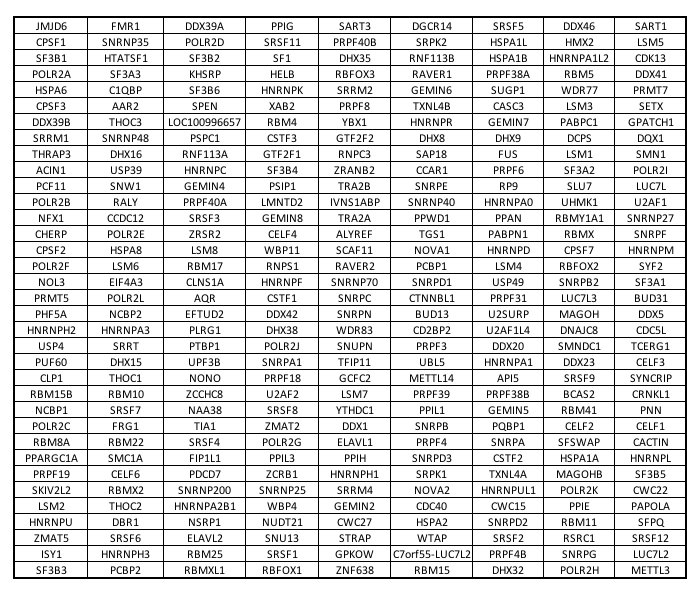


**Supplementary Table 6: *Spliceosome related gene set.***

| ABCC4 | ACSL3 | ADAM7 | APPBP2 |
| --- | --- | --- | --- |
| ATXN3 | BMPR1B | C1orf116 | CAMKK2 |
| CENPN | CRLS1 | DYNLL2 | EAF2 |
| ELK4 | ELL2 | EVI5 | FADS1 |
| FKBP5 | GNAI3 | GNMT | HERC3 |
| HMGCR | INSIG1 | KLK2 | KLK3 |
| MAF | MAP7 | MED28 | MPHOSPH9 |
| MTERFD2 | NGLY1 | NKX3-1 | NNMT |
| PIAS1 | PMEPA1 | PTGER4 | RRP12 |
| SLC30A7 | SPCS3 | TARP | TMEM50A |
| TMPRSS2 | UBE2J1 | ZBTB10 |  |

**Supplementary Table 7: AR regulated genes included in AR signature.**

| ABCC4 | CDK6 | HSD17B14 | NKX3-1 | SORD |
| --- | --- | --- | --- | --- |
| ABHD2 | CENPN | IDI1 | PA2G4 | SPCS3 |
| ACSL3 | DBI | INPP4B | PDLIM5 | SPDEF |
| ACTN1 | DHCR24 | INSIG1 | PGM3 | SRF |
| ADAMTS1 | DNAJB9 | IQGAP2 | PIAS1 | SRP19 |
| ADRM1 | ELK4 | ITGAV | PLPP1 | STEAP4 |
| AKAP12 | ELL2 | KLK2 | PMEPA1 | STK39 |
| AKT1 | ELOVL5 | KLK3 | PTK2B | TMEM50A |
| ALDH1A3 | FADS1 | KRT19 | PTPN21 | TMPRSS2 |
| ANKH | FKBP5 | KRT8 | RAB4A | TNFAIP8 |
| APPBP2 | GNAI3 | LIFR | RPS6KA3 | TPD52 |
| ARID5B | GPD1L | LMAN1 | RRP12 | TSC22D1 |
| AZGP1 | GSR | MAF | SAT1 | UAP1 |
| B2M | GUCY1A1 | MAK | SCD | UBE2I |
| B4GALT1 | H1-0 | MAP7 | SEC24D | UBE2J1 |
| BMPR1B | HERC3 | MERTK | SELENOP | VAPA |
| CAMKK2 | HMGCR | MYL12A | SGK1 | XRCC5 |
| CCND1 | HMGCS1 | NCOA4 | SLC26A2 | XRCC6 |
| CCND3 | HOMER2 | NDRG1 | SLC38A2 | ZBTB10 |
| CDC14B | HPGD | NGLY1 | SMS | ZMIZ1 |

**Supplementary Table 8: Genes included in the androgen response (Hallmark; H) score.**

| AKAP12 | CS | HOXB13 | SMPDL3A | WWC1 | ZNF726 |
| --- | --- | --- | --- | --- | --- |
| ANKRD30B | CTPS2 | IFT57 | SNX1 | ZFX | ZNF761 |
| AR | CYP4F8 | LRRC41 | SPATS2 | ZNF138 | ZNF813 |
| ATF7 | DCAF6 | MALT1 | SRC | ZNF174 | ZNF85 |
| BAZ2A | DOPEY2 | NUDT4 | STEAP1 | ZNF285 |  |
| C4orf36 | ELL2 | PITPNA | STEAP2 | ZNF43 |  |
| CAPN7 | FASN | PPP2R3A | TMBIM6 | ZNF525 |  |
| CBR4 | GALNT7 | PPP3CA | TMSB4Y | ZNF528 |  |
| CCDC115 | GRIN3A | PTER | TTTY15 | ZNF583 |  |
| CDYL2 | GSPT1 | RAB40B | UBE2E3 | ZNF680 |  |
| CROT | HOMER2 | RAB5B | USP54 | ZNF682 |  |

**Supplementary Table 9: Genes included in the AR-V7 signature.**

| **Time (min)** | **% Solvent A** | **% Solvent B** | **Flow (ml/min)** | **Max Pressure Limit (Bar)** |
| --- | --- | --- | --- | --- |
| 0 | 95 | 5 | 0.2 | 600 |
| 1.0 | 80 | 20 | 0.2 | 600 |
| 9.0 | 45 | 55 | 0.2 | 600 |
| 10.0 | 0 | 100 | 0.2 | 600 |
| 11.0 | 0 | 100 | 0.2 | 600 |
| 12.0 | 95 | 5 | 0.2 | 600 |

**Supplementary Table 10: Gradient conditions for fractionation of LUC7L2 peptides.**

**Supplementary Table 11: RMH/ICR Patient cohort characteristics.** N – number, NR – not recorded, AR – androgen receptor, ^ - systemic therapies include docetaxel, cabazitaxel, abiraterone and enzalutamide.

| Gene | Event Type | Event_ID | Difference | Direction | *p value* | FDR |
| --- | --- | --- | --- | --- | --- | --- |
| HNRNPDL | SE | ENSG00000152795_HNRNPDL_4_-_ 83346715_ 83346820_ 83345781_ 83346036_ 83347189_ 83347282_0.357,0.33 | -0.215 | Down | 8.09E-14 | 2.46E-09 |
| CDKL3 | SE | ENSG00000006837_CDKL3_5_-_133695587_133695782_133685939_133686118_133706688_133706732_0.0,0.143 | 0.928 | Up | 2.19E-11 | 3.33E-07 |
| AFMID | SE | ENSG00000183077_AFMID_17_+_ 76201173_ 76201271_ 76200908_ 76200981_ 76201520_ 76201599_1.0,1.0 | -0.948 | Down | 1.26E-10 | 1.28E-06 |
| ENDOV | SE | ENSG00000173818_ENDOV_17_+_ 78395627_ 78395762_ 78389449_ 78389621_ 78396005_ 78396045_1.0,1.0 | -0.915 | Down | 5.78E-10 | 4.40E-06 |
| ASAH2B | SE | ENSG00000204147_ASAH2B_10_+_ 52504961_ 52505034_ 52502674_ 52502770_ 52509102_ 52509162_1.0,1.0 | -0.304 | Down | 1.21E-09 | 6.32E-06 |
| SEPT9 | SE | ENSG00000184640_SEPT9_17_+_ 75447448_ 75447610_ 75446657_ 75446868_ 75478225_ 75478417_1.0,1.0 | -0.863 | Down | 1.25E-09 | 6.32E-06 |
| KCNG1 | SE | ENSG00000026559_KCNG1_20_-_ 49630265_ 49630381_ 49628895_ 49628953_ 49639406_ 49639631_0.0,0.0 | 1 | Up | 1.51E-09 | 6.57E-06 |
| FAM86EP | SE | ENSG00000251669_FAM86EP_4_-_ 3948870_ 3949947_ 3943486_ 3945099_ 3954837_ 3954900_1.0,1.0 | -0.742 | Down | 2.24E-09 | 8.51E-06 |
| LSM14B | SE | ENSG00000149657_LSM14B_20_+_ 60701281_ 60701495_ 60699672_ 60699836_ 60705274_ 60705352_0.283,0.164 | 0.776 | Up | 3.94E-09 | 1.20E-05 |
| LIN9 | SE | ENSG00000183814_LIN9_1_-_226488873_226488906_226475364_226475498_226496809_226496955_0.0,0.0 | 1 | Up | 4.36E-09 | 1.21E-05 |
| TUG1 | SE | ENSG00000253352_TUG1_22_+_ 31368033_ 31368158_ 31367424_ 31367765_ 31368840_ 31369342_1.0,1.0 | -0.848 | Down | 7.47E-09 | 1.89E-05 |
| KLK4 | SE | ENSG00000167749_KLK4_19_-_ 51411614_ 51411751_ 51410189_ 51410342_ 51411834_ 51412085_0.784,0.737 | -0.224 | Down | 1.58E-08 | 3.70E-05 |
| SENP6 | SE | ENSG00000112701_SENP6_6_+_ 76332466_ 76332574_ 76331247_ 76331341_ 76333615_ 76333676_1.0,0.931 | -0.514 | Down | 2.12E-08 | 4.60E-05 |
| C9orf3 | SE | ENSG00000148120_C9orf3_9_+_ 97844856_ 97845001_ 97842975_ 97843062_ 97848963_ 97849441_1.0,1.0 | -0.682 | Down | 2.37E-08 | 4.81E-05 |
| ASAH2B | SE | ENSG00000204147_ASAH2B_10_+_ 52504887_ 52505034_ 52502674_ 52502770_ 52509102_ 52509162_1.0,1.0 | -0.505 | Down | 2.54E-08 | 4.82E-05 |
| ASAP1 | SE | ENSG00000153317_ASAP1_8_-_131373915_131374017_131370262_131370389_131414130_131414216_0.148,0.178 | 0.512 | Up | 2.74E-08 | 4.82E-05 |
| SENP1 | SE | ENSG00000079387_SENP1_12_-_ 48460709_ 48460748_ 48459378_ 48459463_ 48465449_ 48465504_1.0,1.0 | -0.209 | Down | 2.85E-08 | 4.82E-05 |
| ATP11A | SE | ENSG00000068650_ATP11A_13_+_113532530_113532617_113530089_113530255_113536189_113540427_1.0,1.0 | -0.692 | Down | 3.42E-08 | 5.48E-05 |
| MTRF1 | SE | ENSG00000120662_MTRF1_13_-_ 41835826_ 41835961_ 41834628_ 41835051_ 41836350_ 41836467_0.0,0.145 | 0.758 | Up | 3.97E-08 | 6.05E-05 |
| WNK2 | SE | ENSG00000165238_WNK2_9_+_ 96069058_ 96069103_ 96060134_ 96060349_ 96070609_ 96070866_1.0,1.0 | -0.648 | Down | 5.96E-08 | 8.64E-05 |
| TBC1D1 | SE | ENSG00000065882_TBC1D1_4_+_ 38054726_ 38054846_ 38053519_ 38053681_ 38055819_ 38055959_0.0,0.0 | 0.818 | Up | 6.54E-08 | 9.05E-05 |
| LEF1 | SE | ENSG00000138795_LEF1_4_-_108984778_108984813_108969752_108969907_108985491_108985540_1.0,1.0 | -0.635 | Down | 7.51E-08 | 9.94E-05 |
| AP1G1 | SE | ENSG00000166747_AP1G1_16_-_ 71840588_ 71840631_ 71823225_ 71823385_ 71841703_ 71842053_1.0,1.0 | -0.682 | Down | 1.09E-07 | 0.000138421 |
| SLC30A6 | SE | ENSG00000152683_SLC30A6_2_+_ 32431954_ 32432002_ 32422775_ 32422895_ 32445281_ 32446809_1.0,1.0 | -0.681 | Down | 1.28E-07 | 0.000155893 |
| ZNF195 | SE | ENSG00000005801_ZNF195_11_-_ 3382972_ 3383119_ 3381949_ 3382018_ 3392204_ 3392377_1.0,1.0 | -0.559 | Down | 1.54E-07 | 0.000173074 |
| IRF3 | SE | ENSG00000126456_IRF3_19_-_ 50167699_ 50167930_ 50166599_ 50166771_ 50168887_ 50168962_0.0,0.0 | 0.715 | Up | 1.59E-07 | 0.000173074 |
| OBSCN | SE | ENSG00000154358_OBSCN_1_+_228480223_228480487_228479598_228479862_228481053_228481317_1.0,1.0 | -0.683 | Down | 1.97E-07 | 0.000207021 |
| RP11-33B1.1 | SE | ENSG00000245958_RP11-33B1.1_4_+_120418965_120419058_120415640_120415678_120433505_120433619_1.0,1.0 | -0.614 | Down | 2.35E-07 | 0.000238111 |
| TM2D1 | SE | ENSG00000162604_TM2D1_1_-_ 62189959_ 62190097_ 62175000_ 62175109_ 62190573_ 62190785_0.601,1.0 | -0.8 | Down | 2.66E-07 | 0.000238234 |
| EGF | SE | ENSG00000138798_EGF_4_+_110914402_110914525_110909739_110909865_110915888_110916036_1.0,1.0 | -0.434 | Down | 2.63E-07 | 0.000238234 |
| STRADA | SE | ENSG00000266173_STRADA_17_-_ 61784606_ 61784778_ 61783994_ 61784099_ 61787850_ 61787974_1.0,1.0 | -0.61 | Down | 2.48E-07 | 0.000238234 |
| IQCH | SE | ENSG00000103599_IQCH_15_+_ 67687628_ 67687901_ 67681168_ 67681344_ 67692451_ 67692643_1.0,1.0 | -0.832 | Down | 2.94E-07 | 0.000255863 |
| ARHGEF39 | SE | ENSG00000137135_ARHGEF39_9_-_ 35662942_ 35663071_ 35662508_ 35662738_ 35663318_ 35663389_0.509,0.206 | 0.643 | Up | 3.14E-07 | 0.000258403 |
| LRRC23 | SE | ENSG00000010626_LRRC23_12_+_ 7015008_ 7015118_ 7014748_ 7014923_ 7015572_ 7015826_1.0,0.936 | -0.432 | Down | 3.12E-07 | 0.000258403 |
| BTN2A1 | SE | ENSG00000112763_BTN2A1_6_+_ 26463024_ 26463125_ 26459708_ 26460056_ 26463471_ 26463753_0.0,0.0 | 0.436 | Up | 3.42E-07 | 0.000274263 |
| ZNF606 | SE | ENSG00000166704_ZNF606_19_-_ 58511175_ 58511264_ 58499962_ 58500089_ 58512050_ 58512107_1.0,1.0 | -0.536 | Down | 3.77E-07 | 0.000294516 |
| LRRC23 | SE | ENSG00000010626_LRRC23_12_+_ 7019053_ 7019190_ 7016478_ 7016609_ 7023054_ 7023392_1.0,1.0 | -0.597 | Down | 4.31E-07 | 0.000328118 |
| OSBPL5 | SE | ENSG00000021762_OSBPL5_11_-_ 3141650_ 3141854_ 3140776_ 3140861_ 3143226_ 3143328_0.948,1.0 | -0.235 | Down | 4.52E-07 | 0.000335596 |
| EXO5 | SE | ENSG00000164002_EXO5_1_+_ 40975122_ 40975297_ 40974461_ 40974580_ 40975404_ 40975462_0.228,0.181 | 0.713 | Up | 4.70E-07 | 0.000340442 |
| SLC9A8 | SE | ENSG00000197818_SLC9A8_20_+_ 48467346_ 48467381_ 48466115_ 48466217_ 48471974_ 48472118_0.545,0.4 | 0.477 | Up | 4.81E-07 | 0.000340442 |
| RERE | SE | ENSG00000142599_RERE_1_-_ 8483226_ 8483307_ 8482786_ 8482867_ 8483620_ 8483726_1.0,1.0 | -0.638 | Down | 5.83E-07 | 0.000369842 |
| KANSL2 | SE | ENSG00000139620_KANSL2_12_-_ 49072818_ 49073021_ 49065581_ 49065745_ 49073437_ 49073616_1.0,0.946 | -0.272 | Down | 5.81E-07 | 0.000369842 |
| RSRC2 | SE | ENSG00000111011_RSRC2_12_-_123005050_123005128_123003386_123003598_123005931_123005975_1.0,1.0 | -0.323 | Down | 5.73E-07 | 0.000369842 |
| NEK7 | SE | ENSG00000151414_NEK7_1_+_198233254_198233365_198222169_198222310_198288541_198291550_0.0,0.357 | 0.822 | Up | 5.66E-07 | 0.000369842 |
| EGF | SE | ENSG00000138798_EGF_4_+_110929307_110929386_110925660_110925778_110932357_110932657_1.0,1.0 | -0.581 | Down | 7.03E-07 | 0.000436897 |
| L3MBTL3 | SE | ENSG00000198945_L3MBTL3_6_+_130370900_130370975_130370426_130370538_130372393_130372553_1.0,1.0 | -0.621 | Down | 7.18E-07 | 0.000437363 |
| RP11-345J4.5 | SE | ENSG00000261740_RP11-345J4.5_16_-_ 29461432_ 29461597_ 29458122_ 29458347_ 29463429_ 29465434_1.0,1.0 | -0.907 | Down | 7.77E-07 | 0.000463441 |
| SGSM2 | SE | ENSG00000141258_SGSM2_17_+_ 2270564_ 2270699_ 2268508_ 2268635_ 2274555_ 2274709_0.0,0.0 | 0.498 | Up | 8.36E-07 | 0.000489407 |
| ARHGAP44 | SE | ENSG00000006740_ARHGAP44_17_+_ 12832245_ 12832363_ 12823071_ 12823148_ 12844372_ 12844441_1.0,1.0 | -0.299 | Down | 8.61E-07 | 0.000494221 |
| PPM1M | SE | ENSG00000164088_PPM1M_3_+_ 52280989_ 52281244_ 52280710_ 52280828_ 52281697_ 52281810_1.0,1.0 | -0.55 | Down | 9.21E-07 | 0.000518866 |
| TM9SF4 | SE | ENSG00000101337_TM9SF4_20_+_ 30724679_ 30724800_ 30723876_ 30723976_ 30729343_ 30729468_0.0,0.0 | 0.674 | Up | 9.69E-07 | 0.000536238 |
| PRKD2 | SE | ENSG00000105287_PRKD2_19_-_ 47217119_ 47217258_ 47214163_ 47214295_ 47219387_ 47219853_1.0,1.0 | -0.23 | Down | 1.01E-06 | 0.000550578 |
| SPRED2 | SE | ENSG00000198369_SPRED2_2_-_ 65561248_ 65561399_ 65559337_ 65559434_ 65561738_ 65561907_1.0,1.0 | -0.838 | Down | 1.03E-06 | 0.000551286 |
| GAB1 | SE | ENSG00000109458_GAB1_4_+_144355240_144355321_144354643_144354869_144359151_144359194_1.0,1.0 | -0.504 | Down | 1.09E-06 | 0.000573637 |
| SLC4A7 | SE | ENSG00000033867_SLC4A7_3_-_ 27472788_ 27473160_ 27465527_ 27465643_ 27475445_ 27475595_1.0,1.0 | -0.666 | Down | 1.15E-06 | 0.000593085 |
| ELL3 | SE | ENSG00000128886_ELL3_15_-_ 44068236_ 44068349_ 44067919_ 44068121_ 44068706_ 44068770_1.0,1.0 | -0.231 | Down | 1.22E-06 | 0.00059879 |
| LEF1 | SE | ENSG00000138795_LEF1_4_-_108984778_108984819_108968747_108969907_108985491_108985540_1.0,1.0 | -0.367 | Down | 1.19E-06 | 0.00059879 |
| DNASE1L1 | SE | ENSG00000013563_DNASE1L1_X_-_153637447_153637532_153633774_153633996_153640227_153640449_1.0,1.0 | -0.408 | Down | 1.21E-06 | 0.00059879 |
| PRR3 | SE | ENSG00000204576_PRR3_6_+_ 30529104_ 30529285_ 30525090_ 30525227_ 30529610_ 30529901_1.0,1.0 | -0.553 | Down | 1.30E-06 | 0.000626831 |
| HMGN1 | SE | ENSG00000205581_HMGN1_21_-_ 40719304_ 40719409_ 40717755_ 40717884_ 40720217_ 40720265_1.0,1.0 | -0.453 | Down | 1.69E-06 | 0.000802598 |
| NPHP3 | SE | ENSG00000113971_NPHP3_3_-_132415574_132415657_132413670_132413809_132416103_132416206_1.0,1.0 | -0.393 | Down | 1.73E-06 | 0.000810121 |
| CEP57L1 | SE | ENSG00000183137_CEP57L1_6_+_109450506_109450695_109416764_109416778_109466421_109466584_0.0,0.0 | 0.687 | Up | 1.92E-06 | 0.000886673 |
| TXN | SE | ENSG00000136810_TXN_9_-_113013099_113013159_113007057_113007123_113018691_113018920_1.0,1.0 | -0.292 | Down | 1.98E-06 | 0.000899626 |
| PHYKPL | SE | ENSG00000175309_PHYKPL_5_-_177639973_177640104_177638890_177638971_177641796_177641886_1.0,1.0 | -0.494 | Down | 2.07E-06 | 0.00092518 |
| PCNT | SE | ENSG00000160299_PCNT_21_+_ 47864606_ 47864734_ 47862409_ 47862486_ 47865196_ 47865682_1.0,1.0 | -0.436 | Down | 2.26E-06 | 0.000935172 |
| ANKMY1 | SE | ENSG00000144504_ANKMY1_2_-_241468453_241468926_241465220_241465266_241492330_241492474_1.0,1.0 | -0.419 | Down | 2.15E-06 | 0.000935172 |
| DET1 | SE | ENSG00000140543_DET1_15_-_ 89079542_ 89079612_ 89073853_ 89074946_ 89089770_ 89089884_0.399,0.857 | -0.59 | Down | 2.20E-06 | 0.000935172 |
| NAPB | SE | ENSG00000125814_NAPB_20_-_ 23377708_ 23377825_ 23375775_ 23375822_ 23383629_ 23383709_1.0,1.0 | -0.526 | Down | 2.27E-06 | 0.000935172 |
| C11orf65 | SE | ENSG00000166323_C11orf65_11_-_108302472_108302565_108277822_108277876_108332205_108332296_1.0,1.0 | -0.884 | Down | 2.38E-06 | 0.000966526 |
| FAM47E-STBD1 | SE | ENSG00000272414_FAM47E-STBD1_4_+_ 77177330_ 77177676_ 77172873_ 77172973_ 77184856_ 77184996_1.0,1.0 | -0.536 | Down | 2.56E-06 | 0.001025585 |
| CLHC1 | SE | ENSG00000162994_CLHC1_2_-_ 55436539_ 55436652_ 55433405_ 55433512_ 55436765_ 55436967_1.0,1.0 | -0.488 | Down | 2.63E-06 | 0.001036438 |
| WDR31 | SE | ENSG00000148225_WDR31_9_-_116093263_116093396_116091160_116091235_116094186_116094330_1.0,1.0 | -0.448 | Down | 2.66E-06 | 0.001036438 |
| ZNF562 | SE | ENSG00000171466_ZNF562_19_-_ 9771395_ 9771550_ 9762954_ 9764557_ 9785690_ 9785720_1.0,1.0 | -0.29 | Down | 2.70E-06 | 0.001039174 |
| XIAP | SE | ENSG00000101966_XIAP_X_+_122994016_122994143_122993676_122993755_123019480_123019561_1.0,1.0 | -0.475 | Down | 2.88E-06 | 0.001080496 |
| PACRGL | SE | ENSG00000163138_PACRGL_4_+_ 20711305_ 20711396_ 20709425_ 20709493_ 20714410_ 20714545_1.0,1.0 | -0.254 | Down | 2.87E-06 | 0.001080496 |
| ZNF749 | SE | ENSG00000186230_ZNF749_19_+_ 57953252_ 57953379_ 57946696_ 57946961_ 57954658_ 57956853_1.0,1.0 | -0.506 | Down | 2.93E-06 | 0.001086609 |
| CCDC15 | SE | ENSG00000149548_CCDC15_11_+_124863064_124863139_124857022_124858030_124873762_124873855_1.0,1.0 | -0.407 | Down | 3.45E-06 | 0.001246777 |
| MLPH | SE | ENSG00000115648_MLPH_2_+_238449444_238449600_238448990_238449176_238451209_238451302_1.0,1.0 | -0.45 | Down | 3.42E-06 | 0.001246777 |
| FAM173A | SE | ENSG00000103254_FAM173A_16_+_ 772083_ 772134_ 771800_ 771941_ 772308_ 772601_1.0,1.0 | -0.27 | Down | 3.55E-06 | 0.001255201 |
| TM2D3 | SE | ENSG00000184277_TM2D3_15_-_102191898_102191976_102190206_102190364_102192473_102192587_0.505,0.425 | 0.215 | Up | 3.62E-06 | 0.001261919 |
| NLE1 | SE | ENSG00000073536_NLE1_17_-_ 33461961_ 33462078_ 33460357_ 33460517_ 33462267_ 33462470_0.318,0.194 | -0.245 | Down | 3.91E-06 | 0.001314512 |
| IRAK4 | SE | ENSG00000198001_IRAK4_12_+_ 44154727_ 44154775_ 44152752_ 44152819_ 44161905_ 44162075_1.0,1.0 | -0.469 | Down | 3.90E-06 | 0.001314512 |
| CDK20 | SE | ENSG00000156345_CDK20_9_-_ 90585482_ 90585545_ 90584710_ 90584834_ 90585690_ 90585812_1.0,1.0 | -0.429 | Down | 3.93E-06 | 0.001314512 |
| PGC | SE | ENSG00000096088_PGC_6_-_ 41712134_ 41712252_ 41710027_ 41710227_ 41712395_ 41712546_1.0,1.0 | -0.359 | Down | 4.11E-06 | 0.001342644 |
| POLK | SE | ENSG00000122008_POLK_5_+_ 74889790_ 74889874_ 74886168_ 74886265_ 74892046_ 74893003_1.0,1.0 | -0.344 | Down | 4.13E-06 | 0.001342644 |
| FBXL6 | SE | ENSG00000182325_FBXL6_8_-_145581116_145581162_145580649_145580781_145581287_145581446_1.0,1.0 | -0.397 | Down | 4.15E-06 | 0.001342644 |
| IKBKG | SE | ENSG00000073009_IKBKG_X_+_153770496_153770667_153769469_153769606_153780202_153780404_1.0,1.0 | -0.545 | Down | 4.22E-06 | 0.001351502 |
| LIMCH1 | SE | ENSG00000064042_LIMCH1_4_+_ 41628724_ 41629027_ 41621204_ 41621457_ 41631508_ 41631751_1.0,1.0 | -0.482 | Down | 4.40E-06 | 0.001380771 |
| CMC2 | SE | ENSG00000103121_CMC2_16_-_ 81034852_ 81034939_ 81009899_ 81010076_ 81040338_ 81040463_0.381,0.381 | 0.619 | Up | 4.47E-06 | 0.001388397 |
| PHF3 | SE | ENSG00000118482_PHF3_6_+_ 64389900_ 64390062_ 64356431_ 64356700_ 64401626_ 64401933_0.447,0.852 | 0.351 | Up | 4.62E-06 | 0.001404799 |
| SNAP47 | SE | ENSG00000143740_SNAP47_1_+_227919285_227919448_227916239_227916487_227946695_227947186_1.0,1.0 | -0.383 | Down | 4.58E-06 | 0.001404799 |
| SLC2A8 | SE | ENSG00000136856_SLC2A8_9_+_130164835_130165032_130162185_130162285_130166016_130166070_1.0,0.897 | -0.572 | Down | 4.80E-06 | 0.001415309 |
| MAPK7 | SE | ENSG00000166484_MAPK7_17_+_ 19283796_ 19283814_ 19283094_ 19283260_ 19283920_ 19283936_0.0,0.0 | 0.206 | Up | 4.84E-06 | 0.001415309 |
| CHCHD4 | SE | ENSG00000163528_CHCHD4_3_-_ 14163416_ 14163586_ 14160644_ 14160813_ 14166154_ 14166370_1.0,1.0 | -0.443 | Down | 4.81E-06 | 0.001415309 |
| PHF3 | SE | ENSG00000118482_PHF3_6_+_ 64394029_ 64395812_ 64356523_ 64356700_ 64401626_ 64401933_0.591,0.931 | 0.239 | Up | 5.32E-06 | 0.001543276 |
| RBCK1 | SE | ENSG00000125826_RBCK1_20_+_ 401514_ 401650_ 400201_ 400375_ 402770_ 402882_1.0,1.0 | -0.642 | Down | 5.50E-06 | 0.001570813 |
| TAPBP | SE | ENSG00000231925_TAPBP_6_-_ 33271904_ 33271994_ 33267470_ 33269548_ 33272073_ 33272415_0.684,0.655 | 0.284 | Up | 5.52E-06 | 0.001570813 |
| MYO6 | SE | ENSG00000196586_MYO6_6_+_ 76604947_ 76604977_ 76602246_ 76602407_ 76608089_ 76608128_1.0,1.0 | -0.341 | Down | 5.60E-06 | 0.001579339 |
| EXTL2 | SE | ENSG00000162694_EXTL2_1_-_101343949_101344003_101343074_101343459_101354308_101354420_0.0,0.0 | 0.365 | Up | 5.87E-06 | 0.001592701 |
| PEX11A | SE | ENSG00000166821_PEX11A_15_-_ 90229661_ 90229777_ 90224761_ 90227179_ 90233807_ 90233893_1.0,1.0 | -0.373 | Down | 5.77E-06 | 0.001592701 |
| LIMCH1 | SE | ENSG00000064042_LIMCH1_4_+_ 41553141_ 41553208_ 41526425_ 41526495_ 41553337_ 41553412_1.0,0.825 | -0.51 | Down | 5.91E-06 | 0.001592701 |
| HERC2P3 | SE | ENSG00000180229_HERC2P3_15_-_ 20657620_ 20657812_ 20651111_ 20651299_ 20658603_ 20658755_1.0,1.0 | -0.397 | Down | 5.89E-06 | 0.001592701 |
| IRF3 | SE | ENSG00000126456_IRF3_19_-_ 50163969_ 50164085_ 50162831_ 50163090_ 50165204_ 50165585_1.0,1.0 | -0.306 | Down | 5.87E-06 | 0.001592701 |
| DZANK1 | SE | ENSG00000089091_DZANK1_20_-_ 18440796_ 18440950_ 18435890_ 18436005_ 18445893_ 18446096_0.856,0.655 | 0.244 | Up | 6.09E-06 | 0.00161226 |
| PPP2R3C | SE | ENSG00000092020_PPP2R3C_14_-_ 35560275_ 35560413_ 35557156_ 35557216_ 35565763_ 35565839_0.778,0.656 | 0.283 | Up | 6.28E-06 | 0.001634799 |
| FHOD3 | SE | ENSG00000134775_FHOD3_18_+_ 34238037_ 34238151_ 34205473_ 34205712_ 34261398_ 34261533_0.0,0.452 | 0.774 | Up | 6.28E-06 | 0.001634799 |
| TMEM53 | SE | ENSG00000126106_TMEM53_1_-_ 45120611_ 45120881_ 45111031_ 45111136_ 45125845_ 45125967_0.826,0.421 | 0.377 | Up | 6.63E-06 | 0.001709246 |
| IRF3 | SE | ENSG00000126456_IRF3_19_-_ 50163969_ 50164101_ 50162825_ 50163090_ 50165204_ 50165585_1.0,1.0 | -0.387 | Down | 6.69E-06 | 0.0017119 |
| TYSND1 | SE | ENSG00000156521_TYSND1_10_-_ 71903597_ 71903728_ 71897736_ 71899897_ 71906288_ 71906432_1.0,1.0 | -0.401 | Down | 7.13E-06 | 0.001809331 |
| SCRN3 | SE | ENSG00000144306_SCRN3_2_+_175262063_175262132_175260522_175261021_175263002_175263170_0.0,0.0 | 0.549 | Up | 7.32E-06 | 0.001825079 |
| FOXM1 | SE | ENSG00000111206_FOXM1_12_-_ 2974520_ 2974565_ 2973848_ 2973918_ 2975558_ 2975687_0.734,0.883 | -0.235 | Down | 7.55E-06 | 0.001869343 |
| BRCA2 | SE | ENSG00000139618_BRCA2_13_+_ 32918694_ 32918790_ 32910401_ 32915333_ 32920963_ 32921033_1.0,1.0 | -0.278 | Down | 8.68E-06 | 0.001961193 |
| DIP2A | SE | ENSG00000160305_DIP2A_21_+_ 47924273_ 47924402_ 47918494_ 47918746_ 47929169_ 47929289_0.757,0.509 | 0.334 | Up | 8.05E-06 | 0.001961193 |
| ZNF562 | SE | ENSG00000171466_ZNF562_19_-_ 9768684_ 9768811_ 9764383_ 9764557_ 9785690_ 9785776_1.0,1.0 | -0.343 | Down | 8.61E-06 | 0.001961193 |
| DOPEY1 | SE | ENSG00000083097_DOPEY1_6_+_ 83863612_ 83863762_ 83863229_ 83863339_ 83863898_ 83863960_1.0,1.0 | -0.315 | Down | 8.22E-06 | 0.001961193 |
| ZHX3 | SE | ENSG00000174306_ZHX3_20_-_ 39842373_ 39842539_ 39830696_ 39833706_ 39867327_ 39867436_1.0,1.0 | -0.331 | Down | 8.68E-06 | 0.001961193 |
| NCOA1 | SE | ENSG00000084676_NCOA1_2_+_ 24778883_ 24778924_ 24777257_ 24777442_ 24787163_ 24787299_1.0,1.0 | -0.385 | Down | 8.58E-06 | 0.001961193 |
| ZBTB8OS | SE | ENSG00000176261_ZBTB8OS_1_-_ 33100368_ 33100393_ 33093108_ 33093145_ 33116033_ 33116161_1.0,1.0 | -0.59 | Down | 8.79E-06 | 0.001967431 |
| MRRF | SE | ENSG00000148187_MRRF_9_+_125048058_125048225_125047447_125047566_125048317_125048445_1.0,1.0 | -0.492 | Down | 9.00E-06 | 0.001998662 |
| IGFLR1 | SE | ENSG00000126246_IGFLR1_19_-_ 36230610_ 36230670_ 36230115_ 36230527_ 36231924_ 36232124_1.0,1.0 | -0.561 | Down | 9.10E-06 | 0.002006716 |
| GBA | SE | ENSG00000177628_GBA_1_-_155210876_155210971_155209676_155209868_155213885_155214021_0.675,0.165 | 0.58 | Up | 9.61E-06 | 0.002103876 |
| HIST1H2BJ | SE | ENSG00000124635_HIST1H2BJ_6_-_ 27095042_ 27095180_ 27094057_ 27094241_ 27100145_ 27100541_0.601,1.0 | -0.729 | Down | 1.01E-05 | 0.002184489 |
| TTN-AS1 | SE | ENSG00000237298_TTN-AS1_2_+_179396040_179396305_179388178_179388363_179400458_179400555_1.0,1.0 | -0.483 | Down | 1.02E-05 | 0.002188894 |
| DIP2A | SE | ENSG00000160305_DIP2A_21_+_ 47924270_ 47924402_ 47918494_ 47918746_ 47929169_ 47929289_0.642,0.278 | 0.47 | Up | 1.07E-05 | 0.00226127 |
| CCDC43 | SE | ENSG00000180329_CCDC43_17_-_ 42757952_ 42758020_ 42754850_ 42756411_ 42759370_ 42759506_1.0,1.0 | -0.256 | Down | 1.10E-05 | 0.002302079 |
| DPY19L2P1 | SE | ENSG00000189212_DPY19L2P1_7_-_ 35187402_ 35187494_ 35184602_ 35184702_ 35189699_ 35189886_1.0,1.0 | -0.432 | Down | 1.10E-05 | 0.002302079 |
| WASF1 | SE | ENSG00000112290_WASF1_6_-_110481837_110481935_110448671_110448832_110499800_110499945_0.328,0.207 | 0.51 | Up | 1.12E-05 | 0.002328363 |
| MKS1 | SE | ENSG00000011143_MKS1_17_-_ 56292101_ 56292259_ 56291619_ 56291748_ 56293448_ 56293604_1.0,1.0 | -0.44 | Down | 1.17E-05 | 0.002408956 |
| PXDN | SE | ENSG00000130508_PXDN_2_-_ 1691403_ 1691475_ 1687851_ 1687923_ 1695699_ 1695771_1.0,1.0 | -0.535 | Down | 1.19E-05 | 0.002439756 |
| PKIG | SE | ENSG00000168734_PKIG_20_+_ 43211225_ 43211372_ 43160425_ 43160619_ 43218437_ 43218507_0.139,0.042 | 0.369 | Up | 1.21E-05 | 0.002459117 |
| HDX | SE | ENSG00000165259_HDX_X_-_ 83695539_ 83695593_ 83616473_ 83616620_ 83723479_ 83724583_1.0,1.0 | -0.353 | Down | 1.27E-05 | 0.002556433 |
| PMF1 | SE | ENSG00000160783_PMF1_1_+_156195347_156195459_156182816_156182967_156203418_156203519_1.0,1.0 | -0.514 | Down | 1.35E-05 | 0.002706326 |
| ARHGAP12 | SE | ENSG00000165322_ARHGAP12_10_-_ 32128232_ 32128247_ 32120666_ 32120728_ 32128564_ 32128639_1.0,1.0 | -0.37 | Down | 1.40E-05 | 0.002740311 |
| C8orf44 | SE | ENSG00000213865_C8orf44_8_+_ 67588979_ 67589137_ 67579886_ 67579936_ 67589876_ 67590189_1.0,1.0 | -0.532 | Down | 1.39E-05 | 0.002740311 |
| MAPKBP1 | SE | ENSG00000137802_MAPKBP1_15_+_ 42107456_ 42107603_ 42106747_ 42106937_ 42107821_ 42107997_1.0,1.0 | -0.317 | Down | 1.43E-05 | 0.002791375 |
| ANKMY2 | SE | ENSG00000106524_ANKMY2_7_-_ 16664607_ 16664706_ 16655368_ 16655529_ 16666664_ 16666803_1.0,1.0 | -0.284 | Down | 1.46E-05 | 0.002819764 |
| PRPF39 | SE | ENSG00000185246_PRPF39_14_+_ 45565626_ 45565695_ 45565305_ 45565431_ 45565798_ 45565961_0.401,0.0 | 0.728 | Up | 1.46E-05 | 0.002819764 |
| HERC2P3 | SE | ENSG00000180229_HERC2P3_15_-_ 20657620_ 20657841_ 20651111_ 20651299_ 20658603_ 20658755_1.0,1.0 | -0.355 | Down | 1.52E-05 | 0.00284181 |
| TOP1MT | SE | ENSG00000184428_TOP1MT_8_-_144414656_144414771_144413393_144413509_144416909_144417024_0.523,0.354 | -0.421 | Down | 1.51E-05 | 0.00284181 |
| METTL23 | SE | ENSG00000181038_METTL23_17_+_ 74723051_ 74723295_ 74722924_ 74722961_ 74725771_ 74725876_1.0,1.0 | -0.469 | Down | 1.51E-05 | 0.00284181 |
| FAM195A | SE | ENSG00000172366_FAM195A_16_+_ 692119_ 692249_ 691928_ 692043_ 696471_ 696608_0.0,0.0 | 0.397 | Up | 1.49E-05 | 0.00284181 |
| BDP1 | SE | ENSG00000145734_BDP1_5_+_ 70858601_ 70858722_ 70858100_ 70858347_ 70860580_ 70863647_1.0,0.874 | -0.475 | Down | 1.59E-05 | 0.002895937 |
| GGA3 | SE | ENSG00000125447_GGA3_17_-_ 73244920_ 73245089_ 73242792_ 73242877_ 73257628_ 73257681_0.474,1.0 | -0.737 | Down | 1.67E-05 | 0.002979525 |
| PRIMPOL | SE | ENSG00000164306_PRIMPOL_4_+_185606565_185606652_185603401_185603490_185606729_185606838_1.0,1.0 | -0.262 | Down | 1.67E-05 | 0.002979525 |
| TTLL11 | SE | ENSG00000175764_TTLL11_9_-_124622615_124622722_124584249_124585158_124632775_124633027_0.531,0.0 | 0.734 | Up | 1.71E-05 | 0.002979525 |
| MAP2K5 | SE | ENSG00000137764_MAP2K5_15_+_ 68020253_ 68020283_ 67995674_ 67995746_ 68040568_ 68040595_1.0,1.0 | -0.408 | Down | 1.70E-05 | 0.002979525 |
| C5orf45 | SE | ENSG00000161010_C5orf45_5_-_179267871_179267959_179264275_179264885_179268906_179269064_1.0,1.0 | -0.292 | Down | 1.75E-05 | 0.002979829 |
| KLHDC10 | SE | ENSG00000128607_KLHDC10_7_+_129736760_129736847_129710349_129710649_129756284_129756506_0.822,0.661 | -0.46 | Down | 1.75E-05 | 0.002979829 |
| FER | SE | ENSG00000151422_FER_5_+_108103793_108103939_108083522_108083701_108133824_108134090_0.328,0.573 | 0.489 | Up | 1.74E-05 | 0.002979829 |
| C3orf18 | SE | ENSG00000088543_C3orf18_3_-_ 50602896_ 50603292_ 50599152_ 50599178_ 50604893_ 50605111_0.409,0.7 | 0.446 | Up | 1.78E-05 | 0.0029882 |
| GPR98 | SE | ENSG00000164199_GPR98_5_+_ 89975365_ 89975446_ 89971896_ 89972026_ 89977131_ 89977271_0.0,0.387 | 0.806 | Up | 1.85E-05 | 0.003037486 |
| ZNF827 | SE | ENSG00000151612_ZNF827_4_-_146684241_146684274_146678778_146682750_146686130_146686317_1.0,1.0 | -0.44 | Down | 1.88E-05 | 0.003055257 |
| LPCAT4 | SE | ENSG00000176454_LPCAT4_15_-_ 34653600_ 34653733_ 34651789_ 34652410_ 34654396_ 34654522_1.0,1.0 | -0.379 | Down | 1.92E-05 | 0.003110787 |
| DCLRE1C | SE | ENSG00000152457_DCLRE1C_10_-_ 14978536_ 14978592_ 14977461_ 14977563_ 14981808_ 14981868_1.0,1.0 | -0.368 | Down | 1.96E-05 | 0.00316014 |
| GAA | SE | ENSG00000171298_GAA_17_+_ 78075609_ 78075689_ 78075392_ 78075424_ 78078353_ 78078931_0.323,0.805 | 0.436 | Up | 2.01E-05 | 0.003212655 |
| WASF3 | SE | ENSG00000132970_WASF3_13_+_ 27254171_ 27254338_ 27246008_ 27246126_ 27255190_ 27255457_1.0,1.0 | -0.399 | Down | 2.03E-05 | 0.00322606 |
| SDR39U1 | SE | ENSG00000100445_SDR39U1_14_-_ 24910879_ 24911001_ 24910059_ 24910132_ 24911383_ 24911472_1.0,0.914 | -0.341 | Down | 2.18E-05 | 0.003423667 |
| ST7-OT4 | SE | ENSG00000214188_ST7-OT4_7_+_116595027_116595207_116594673_116594733_116738666_116738860_1.0,1.0 | -0.385 | Down | 2.21E-05 | 0.003442977 |
| WDR62 | SE | ENSG00000075702_WDR62_19_+_ 36592565_ 36592676_ 36592115_ 36592219_ 36592915_ 36593053_1.0,1.0 | -0.265 | Down | 2.22E-05 | 0.003446302 |
| SAC3D1 | SE | ENSG00000168061_SAC3D1_11_+_ 64808757_ 64809338_ 64808372_ 64808578_ 64811696_ 64812271_1.0,1.0 | -0.385 | Down | 2.23E-05 | 0.003446302 |
| SNX10 | SE | ENSG00000086300_SNX10_7_+_ 26396626_ 26396747_ 26393676_ 26393804_ 26400594_ 26400651_1.0,1.0 | -0.464 | Down | 2.31E-05 | 0.003532612 |
| ALDOA | SE | ENSG00000149925_ALDOA_16_+_ 30066104_ 30066248_ 30064784_ 30064820_ 30075049_ 30075359_0.0,0.329 | 0.739 | Up | 2.35E-05 | 0.003571281 |
| PAQR3 | SE | ENSG00000163291_PAQR3_4_-_ 79843982_ 79844137_ 79843294_ 79843575_ 79845010_ 79845101_0.486,0.24 | -0.363 | Down | 2.45E-05 | 0.003670417 |
| EXO5 | SE | ENSG00000164002_EXO5_1_+_ 40975122_ 40975297_ 40974461_ 40974580_ 40980186_ 40980518_0.069,0.0 | 0.514 | Up | 2.50E-05 | 0.00373343 |
| MAP2 | SE | ENSG00000078018_MAP2_2_+_210561265_210561472_210561037_210561074_210565000_210565062_1.0,0.0 | 0.5 | Up | 2.57E-05 | 0.003777263 |
| CAMTA1 | SE | ENSG00000171735_CAMTA1_1_+_ 6867042_ 6867148_ 6845577_ 6845635_ 6931816_ 6932079_0.221,0.63 | -0.425 | Down | 2.56E-05 | 0.003777263 |
| GOLGA2 | SE | ENSG00000167110_GOLGA2_9_-_131035063_131035144_131030698_131030803_131036128_131036132_0.136,0.0 | 0.283 | Up | 2.61E-05 | 0.003812847 |
| PIGO | SE | ENSG00000165282_PIGO_9_-_ 35096151_ 35096477_ 35095140_ 35095563_ 35096557_ 35096591_0.0,0.0 | 0.439 | Up | 2.65E-05 | 0.003854043 |
| MKS1 | SE | ENSG00000011143_MKS1_17_-_ 56292101_ 56292199_ 56291619_ 56291748_ 56293448_ 56293604_1.0,1.0 | -0.223 | Down | 2.77E-05 | 0.004011108 |
| KIAA1191 | SE | ENSG00000122203_KIAA1191_5_-_175786483_175786570_175775252_175775359_175788604_175788764_1.0,1.0 | -0.448 | Down | 3.00E-05 | 0.004305117 |
| OGG1 | SE | ENSG00000114026_OGG1_3_+_ 9796387_ 9796569_ 9793453_ 9793633_ 9807492_ 9808352_1.0,1.0 | -0.346 | Down | 3.02E-05 | 0.004311637 |
| SLC37A3 | SE | ENSG00000157800_SLC37A3_7_-_140043211_140043363_140037083_140037149_140045668_140045770_0.866,0.679 | 0.213 | Up | 3.04E-05 | 0.004321165 |
| B4GALNT4 | SE | ENSG00000182272_B4GALNT4_11_+_ 380670_ 380951_ 380291_ 380445_ 381668_ 382109_1.0,1.0 | -0.339 | Down | 3.34E-05 | 0.00468654 |
| PRKRIP1 | SE | ENSG00000128563_PRKRIP1_7_+_102036423_102036984_102016658_102016769_102039994_102040095_1.0,1.0 | -0.365 | Down | 3.34E-05 | 0.00468654 |
| ECHDC2 | SE | ENSG00000121310_ECHDC2_1_-_ 53363108_ 53363156_ 53362074_ 53362269_ 53364845_ 53364896_1.0,0.748 | -0.622 | Down | 3.36E-05 | 0.004687121 |
| ZNF445 | SE | ENSG00000185219_ZNF445_3_-_ 44492805_ 44492974_ 44492359_ 44492454_ 44496612_ 44497188_1.0,1.0 | -0.324 | Down | 3.43E-05 | 0.00477092 |
| SDR39U1 | SE | ENSG00000100445_SDR39U1_14_-_ 24910883_ 24911001_ 24909988_ 24910132_ 24911383_ 24911466_1.0,0.856 | -0.604 | Down | 3.49E-05 | 0.00480252 |
| DLGAP4 | SE | ENSG00000080845_DLGAP4_20_+_ 35093667_ 35093770_ 35089870_ 35089913_ 35125107_ 35125469_1.0,0.277 | -0.639 | Down | 3.53E-05 | 0.004820402 |
| SLC43A1 | SE | ENSG00000149150_SLC43A1_11_-_ 57259063_ 57259099_ 57256723_ 57256865_ 57259188_ 57259335_1.0,1.0 | -0.309 | Down | 3.59E-05 | 0.004860079 |
| AFMID | SE | ENSG00000183077_AFMID_17_+_ 76198783_ 76198832_ 76187050_ 76187141_ 76202026_ 76202131_1.0,1.0 | -0.263 | Down | 3.63E-05 | 0.004866172 |
| P4HTM | SE | ENSG00000178467_P4HTM_3_+_ 49041530_ 49041693_ 49039932_ 49040029_ 49044119_ 49044548_1.0,1.0 | -0.317 | Down | 3.63E-05 | 0.004866172 |
| CCDC171 | SE | ENSG00000164989_CCDC171_9_+_ 15594038_ 15594170_ 15591363_ 15591554_ 15623264_ 15623411_1.0,1.0 | -0.352 | Down | 3.65E-05 | 0.004866172 |
| CEP57L1 | SE | ENSG00000183137_CEP57L1_6_+_109476993_109477080_109476432_109476510_109480227_109480305_1.0,1.0 | -0.313 | Down | 3.74E-05 | 0.004922974 |
| AKAP13 | SE | ENSG00000170776_AKAP13_15_+_ 86205618_ 86205684_ 86201767_ 86201821_ 86207793_ 86207986_0.576,0.629 | -0.511 | Down | 3.72E-05 | 0.004922974 |
| MPDZ | SE | ENSG00000107186_MPDZ_9_-_ 13143464_ 13143563_ 13139985_ 13140148_ 13147546_ 13147657_0.0,0.0 | 0.433 | Up | 3.79E-05 | 0.004931231 |
| PXN | SE | ENSG00000089159_PXN_12_-_120653362_120653464_120652905_120653220_120659425_120659561_0.026,0.1 | 0.203 | Up | 3.83E-05 | 0.004957991 |
| C4orf36 | SE | ENSG00000163633_C4orf36_4_-_ 87853373_ 87853471_ 87847018_ 87847478_ 87854546_ 87854694_0.128,0.24 | 0.652 | Up | 3.95E-05 | 0.005037121 |
| MYO5A | SE | ENSG00000197535_MYO5A_15_-_ 52641014_ 52641023_ 52638557_ 52638658_ 52643450_ 52643678_0.0,0.0 | 0.511 | Up | 3.92E-05 | 0.005037121 |
| TPCN1 | SE | ENSG00000186815_TPCN1_12_+_113663048_113663141_113659264_113659431_113664532_113664769_1.0,0.857 | -0.519 | Down | 3.94E-05 | 0.005037121 |
| SCYL3 | SE | ENSG00000000457_SCYL3_1_-_169828181_169828353_169824936_169825098_169831753_169831938_0.668,0.691 | 0.321 | Up | 3.96E-05 | 0.005037121 |
| IFT122 | SE | ENSG00000163913_IFT122_3_+_129183477_129183624_129182402_129182469_129188184_129188260_1.0,1.0 | -0.246 | Down | 4.16E-05 | 0.005215034 |
| COBL | SE | ENSG00000106078_COBL_7_-_ 51240152_ 51240227_ 51203854_ 51204028_ 51251798_ 51251896_0.0,0.115 | 0.323 | Up | 4.15E-05 | 0.005215034 |
| SFMBT1 | SE | ENSG00000163935_SFMBT1_3_-_ 53077151_ 53077270_ 53003116_ 53003274_ 53080475_ 53080766_0.0,0.212 | 0.789 | Up | 4.34E-05 | 0.005416535 |
| GORAB | SE | ENSG00000120370_GORAB_1_+_170505450_170505562_170502604_170502792_170508350_170508708_0.0,0.0 | 0.609 | Up | 4.74E-05 | 0.005782946 |
| TACC2 | SE | ENSG00000138162_TACC2_10_+_123892123_123892249_123872553_123872748_123954554_123954691_1.0,1.0 | -0.299 | Down | 4.75E-05 | 0.005782946 |
| IL15RA | SE | ENSG00000134470_IL15RA_10_-_ 6005705_ 6005804_ 6002329_ 6002530_ 6008107_ 6008302_0.0,0.0 | 0.347 | Up | 4.81E-05 | 0.005831693 |
| KIF9 | SE | ENSG00000088727_KIF9_3_-_ 47284540_ 47284735_ 47282290_ 47282505_ 47286280_ 47286414_1.0,1.0 | -0.432 | Down | 4.86E-05 | 0.005852162 |
| GGCT | SE | ENSG00000006625_GGCT_7_-_ 30537356_ 30537512_ 30536592_ 30536851_ 30540151_ 30540297_0.0,0.0 | 0.216 | Up | 5.18E-05 | 0.006156068 |
| PNISR | SE | ENSG00000132424_PNISR_6_-_ 99851704_ 99851758_ 99850415_ 99850586_ 99852478_ 99852578_1.0,1.0 | -0.248 | Down | 5.23E-05 | 0.006196658 |
| DDX55 | SE | ENSG00000111364_DDX55_12_+_124090477_124090706_124086645_124086803_124092146_124092209_0.274,0.159 | 0.61 | Up | 5.46E-05 | 0.006411152 |
| ZNF786 | SE | ENSG00000197362_ZNF786_7_-_148777682_148777809_148771477_148771630_148787714_148787797_1.0,1.0 | -0.27 | Down | 5.62E-05 | 0.006578308 |
| SLC37A3 | SE | ENSG00000157800_SLC37A3_7_-_140045015_140045063_140037083_140037149_140045668_140045770_0.69,0.489 | 0.351 | Up | 5.69E-05 | 0.006593748 |
| BANP | SE | ENSG00000172530_BANP_16_+_ 88008653_ 88008809_ 87985039_ 87985121_ 88014641_ 88014733_1.0,1.0 | -0.244 | Down | 5.70E-05 | 0.006593748 |
| TEAD2 | SE | ENSG00000074219_TEAD2_19_-_ 49859215_ 49859227_ 49858568_ 49858676_ 49860508_ 49860571_0.0,0.093 | 0.517 | Up | 5.73E-05 | 0.006608745 |
| OCIAD1 | SE | ENSG00000109180_OCIAD1_4_+_ 48833243_ 48833266_ 48833079_ 48833158_ 48834636_ 48834699_0.0,0.3 | 0.737 | Up | 5.80E-05 | 0.006640329 |
| AHI1 | SE | ENSG00000135541_AHI1_6_-_135818325_135818387_135813365_135813429_135818720_135818903_0.257,0.862 | 0.441 | Up | 5.80E-05 | 0.006640329 |
| ZNF845 | SE | ENSG00000213799_ZNF845_19_+_ 53844076_ 53844178_ 53837001_ 53837045_ 53844487_ 53844575_0.224,0.0 | 0.384 | Up | 5.92E-05 | 0.006749472 |
| WNK2 | SE | ENSG00000165238_WNK2_9_+_ 96061351_ 96061543_ 96060134_ 96060349_ 96070609_ 96070866_1.0,1.0 | -0.279 | Down | 6.00E-05 | 0.00681877 |
| TGFBR2 | SE | ENSG00000163513_TGFBR2_3_+_ 30664690_ 30664765_ 30648092_ 30648469_ 30686238_ 30686407_0.661,1.0 | -0.49 | Down | 6.07E-05 | 0.006869797 |
| DYX1C1 | SE | ENSG00000256061_DYX1C1_15_-_ 55724694_ 55724800_ 55722505_ 55722977_ 55727102_ 55727256_0.0,0.63 | 0.585 | Up | 6.21E-05 | 0.006996571 |
| CENPK | SE | ENSG00000123219_CENPK_5_-_ 64850623_ 64850725_ 64848319_ 64848376_ 64857289_ 64857391_0.555,0.852 | 0.265 | Up | 6.27E-05 | 0.007046394 |
| PIGO | SE | ENSG00000165282_PIGO_9_-_ 35095875_ 35095973_ 35095051_ 35095563_ 35096151_ 35096217_1.0,1.0 | -0.394 | Down | 6.46E-05 | 0.007174123 |
| ZC3HC1 | SE | ENSG00000091732_ZC3HC1_7_-_129688813_129688984_129679303_129679387_129691060_129691209_0.711,0.593 | 0.327 | Up | 6.67E-05 | 0.007278945 |
| TMEM25 | SE | ENSG00000149582_TMEM25_11_+_118404134_118404266_118402864_118403176_118404571_118404602_0.878,0.902 | -0.283 | Down | 6.67E-05 | 0.007278945 |
| AP1G1 | SE | ENSG00000166747_AP1G1_16_-_ 71841703_ 71841741_ 71823222_ 71823385_ 71841917_ 71842053_0.0,0.0 | 0.243 | Up | 6.80E-05 | 0.007382702 |
| SLC26A1 | SE | ENSG00000145217_SLC26A1_4_-_ 986508_ 986723_ 984915_ 985518_ 987088_ 987224_1.0,0.44 | -0.638 | Down | 6.82E-05 | 0.007382702 |
| EEF1D | SE | ENSG00000104529_EEF1D_8_-_144672777_144672908_144672157_144672251_144679048_144679275_0.0,0.34 | 0.83 | Up | 7.09E-05 | 0.007628796 |
| BANP | SE | ENSG00000172530_BANP_16_+_ 88008653_ 88008813_ 87985086_ 87985121_ 88014641_ 88014733_1.0,1.0 | -0.245 | Down | 7.46E-05 | 0.007936532 |
| CXorf38 | SE | ENSG00000185753_CXorf38_X_-_ 40498260_ 40499572_ 40496258_ 40496408_ 40506258_ 40506393_1.0,1.0 | -0.353 | Down | 7.55E-05 | 0.007941998 |
| RBBP8NL | SE | ENSG00000130701_RBBP8NL_20_-_ 60990176_ 60990343_ 60988876_ 60989612_ 60990633_ 60990716_1.0,1.0 | -0.291 | Down | 7.55E-05 | 0.007941998 |
| DBF4B | SE | ENSG00000161692_DBF4B_17_+_ 42809545_ 42809633_ 42808332_ 42808383_ 42811457_ 42811531_0.0,0.149 | 0.594 | Up | 7.59E-05 | 0.007941998 |
| TBCD | SE | ENSG00000141556_TBCD_17_+_ 80867160_ 80867183_ 80863811_ 80863929_ 80869633_ 80869665_1.0,1.0 | -0.21 | Down | 7.72E-05 | 0.007992942 |
| RALGAPB | SE | ENSG00000170471_RALGAPB_20_+_ 37198530_ 37198639_ 37195738_ 37195875_ 37202792_ 37202941_1.0,1.0 | -0.307 | Down | 7.93E-05 | 0.008187167 |
| C6orf52 | SE | ENSG00000137434_C6orf52_6_-_ 10685081_ 10685156_ 10683419_ 10683465_ 10687198_ 10687397_0.0,0.0 | 0.22 | Up | 8.21E-05 | 0.00843726 |
| FAM86C2P | SE | ENSG00000160172_FAM86C2P_11_-_ 67564154_ 67564304_ 67559237_ 67560764_ 67570472_ 67570535_0.138,0.0 | 0.35 | Up | 8.23E-05 | 0.00843726 |
| WNK1 | SE | ENSG00000060237_WNK1_12_+_ 988738_ 989197_ 987377_ 987527_ 990857_ 990955_0.482,0.532 | -0.223 | Down | 8.52E-05 | 0.008648722 |
| SGK1 | SE | ENSG00000118515_SGK1_6_-_134491963_134492053_134490383_134491573_134492160_134492316_1.0,1.0 | -0.677 | Down | 8.83E-05 | 0.008891839 |
| ACIN1 | SE | ENSG00000100813_ACIN1_14_-_ 23559190_ 23559310_ 23550956_ 23551045_ 23559730_ 23559842_0.349,0.239 | -0.206 | Down | 9.00E-05 | 0.009002419 |
| IGFLR1 | SE | ENSG00000126246_IGFLR1_19_-_ 36231280_ 36231465_ 36230157_ 36230527_ 36231924_ 36232124_1.0,1.0 | -0.31 | Down | 9.11E-05 | 0.009027383 |
| CHMP4C | SE | ENSG00000164695_CHMP4C_8_+_ 82665298_ 82665476_ 82644668_ 82645051_ 82667604_ 82667719_1.0,1.0 | -0.246 | Down | 9.15E-05 | 0.009046516 |
| MB | SE | ENSG00000198125_MB_22_-_ 36013209_ 36013312_ 36006930_ 36007153_ 36019237_ 36019448_0.564,0.775 | 0.302 | Up | 9.32E-05 | 0.009123313 |
| C4orf29 | SE | ENSG00000164074_C4orf29_4_+_128922870_128922915_128905493_128905578_128930074_128930153_0.0,0.0 | 0.681 | Up | 9.36E-05 | 0.009133248 |
| PDDC1 | SE | ENSG00000177225_PDDC1_11_-_ 770313_ 770398_ 767219_ 767373_ 771332_ 771426_0.0,0.0 | 0.327 | Up | 9.42E-05 | 0.009133262 |
| OSBPL5 | SE | ENSG00000021762_OSBPL5_11_-_ 3141773_ 3141854_ 3140776_ 3140861_ 3143226_ 3143328_0.655,1.0 | -0.459 | Down | 9.48E-05 | 0.009161568 |
| FAM160A1 | SE | ENSG00000164142_FAM160A1_4_+_152403675_152403800_152330503_152330617_152487289_152487516_0.0,0.26 | 0.662 | Up | 9.71E-05 | 0.009262856 |
| HDLBP | SE | ENSG00000115677_HDLBP_2_-_242208368_242208520_242207891_242207956_242208620_242208710_0.489,0.544 | 0.484 | Up | 9.69E-05 | 0.009262856 |
| LETMD1 | SE | ENSG00000050426_LETMD1_12_+_ 51449932_ 51450028_ 51447560_ 51447643_ 51450132_ 51450285_1.0,1.0 | -0.222 | Down | 9.85E-05 | 0.009343877 |
| ZNF562 | SE | ENSG00000171466_ZNF562_19_-_ 9770054_ 9770143_ 9767222_ 9767329_ 9771395_ 9771550_1.0,1.0 | -0.254 | Down | 0.00010104 | 0.009521371 |
| SLC45A4 | SE | ENSG00000022567_SLC45A4_8_-_142231675_142231864_142229748_142229928_142264087_142264328_1.0,1.0 | -0.233 | Down | 0.00010092 | 0.009521371 |
| HERC3 | SE | ENSG00000138641_HERC3_4_+_ 89597368_ 89597392_ 89591289_ 89591403_ 89597484_ 89597574_0.793,1.0 | -0.432 | Down | 0.00010267 | 0.009644921 |
| LIMCH1 | SE | ENSG00000064042_LIMCH1_4_+_ 41631508_ 41631751_ 41621204_ 41621457_ 41633164_ 41633494_1.0,1.0 | -0.524 | Down | 0.00010543 | 0.009843741 |
| TTC6 | SE | ENSG00000139865_TTC6_14_+_ 38222303_ 38222440_ 38218918_ 38219048_ 38259921_ 38260042_1.0,1.0 | -0.297 | Down | 0.0001065 | 0.009883163 |
| SLC41A2 | SE | ENSG00000136052_SLC41A2_12_-_105325409_105325569_105322077_105322472_105351865_105352066_0.189,0.65 | -0.419 | Down | 0.00010746 | 0.009911605 |
| PARP11 | SE | ENSG00000111224_PARP11_12_-_ 3973001_ 3973123_ 3939055_ 3939184_ 3982377_ 3982521_1.0,1.0 | -0.258 | Down | 0.00010736 | 0.009911605 |
| KIAA1958 | SE | ENSG00000165185_KIAA1958_9_+_115380150_115380234_115336336_115337531_115407929_115408102_0.0,0.0 | 0.3 | Up | 0.00010944 | 0.010063718 |
| ATP2C1 | SE | ENSG00000017260_ATP2C1_3_+_130613551_130613619_130612834_130613181_130649259_130649370_0.881,1.0 | -0.221 | Down | 0.00011138 | 0.010150405 |
| UFM1 | SE | ENSG00000120686_UFM1_13_+_ 38932229_ 38932269_ 38928375_ 38928433_ 38933437_ 38933470_0.538,0.437 | 0.415 | Up | 0.00011263 | 0.010233247 |
| ZNF639 | SE | ENSG00000121864_ZNF639_3_+_179042829_179043110_179040863_179041079_179045348_179045419_1.0,1.0 | -0.302 | Down | 0.00011632 | 0.010443899 |
| DPM1 | SE | ENSG00000000419_DPM1_20_-_ 49557641_ 49557746_ 49557401_ 49557492_ 49558567_ 49558663_1.0,1.0 | -0.228 | Down | 0.00011679 | 0.010455347 |
| GMIP | SE | ENSG00000089639_GMIP_19_-_ 19746452_ 19746530_ 19746223_ 19746378_ 19747515_ 19747596_1.0,1.0 | -0.245 | Down | 0.00011935 | 0.010565521 |
| TMEM129 | SE | ENSG00000168936_TMEM129_4_-_ 1719242_ 1719430_ 1718327_ 1719155_ 1719878_ 1719962_0.68,0.872 | 0.224 | Up | 0.00011998 | 0.010565521 |
| B4GALNT1 | SE | ENSG00000135454_B4GALNT1_12_-_ 58024982_ 58025147_ 58024762_ 58024869_ 58025697_ 58025916_1.0,1.0 | -0.253 | Down | 0.00011931 | 0.010565521 |
| ZNF92 | SE | ENSG00000146757_ZNF92_7_+_ 64852814_ 64852941_ 64838711_ 64838913_ 64863253_ 64865997_1.0,1.0 | -0.211 | Down | 0.00011984 | 0.010565521 |
| RAB17 | SE | ENSG00000124839_RAB17_2_-_238486646_238486798_238485899_238486025_238494640_238494800_1.0,1.0 | -0.215 | Down | 0.00012135 | 0.010616834 |
| PICALM | SE | ENSG00000073921_PICALM_11_-_ 85701292_ 85701421_ 85692914_ 85693046_ 85707868_ 85707972_0.464,0.539 | 0.434 | Up | 0.0001235 | 0.010740554 |
| C2 | SE | ENSG00000166278_C2_6_+_ 31901942_ 31902076_ 31901643_ 31901742_ 31903699_ 31903767_0.203,0.604 | 0.597 | Up | 0.00012463 | 0.010807513 |
| NEK1 | SE | ENSG00000137601_NEK1_4_-_170476870_170477002_170458959_170459062_170477082_170477246_0.339,0.596 | 0.424 | Up | 0.0001259 | 0.010863336 |
| ZNF75A | SE | ENSG00000162086_ZNF75A_16_+_ 3358312_ 3358836_ 3355405_ 3355643_ 3361752_ 3361948_1.0,1.0 | -0.331 | Down | 0.00013137 | 0.01126418 |
| GOSR2 | SE | ENSG00000108433_GOSR2_17_+_ 45008464_ 45008573_ 45006885_ 45006950_ 45009432_ 45009565_0.789,0.619 | 0.238 | Up | 0.00013316 | 0.011353676 |
| TCTN1 | SE | ENSG00000204852_TCTN1_12_+_111082771_111082934_111078250_111078322_111085000_111085141_0.315,0.535 | 0.468 | Up | 0.00013315 | 0.011353676 |
| ABHD2 | SE | ENSG00000140526_ABHD2_15_+_ 89647133_ 89647275_ 89645671_ 89645807_ 89656955_ 89657055_1.0,1.0 | -0.298 | Down | 0.00013607 | 0.011472943 |
| ACAD10 | SE | ENSG00000111271_ACAD10_12_+_112167609_112167760_112165765_112165947_112174634_112174808_1.0,1.0 | -0.492 | Down | 0.00013707 | 0.011525492 |
| ZNF573 | SE | ENSG00000189144_ZNF573_19_-_ 38263577_ 38263622_ 38262203_ 38262336_ 38264300_ 38264391_0.312,0.131 | -0.202 | Down | 0.00013856 | 0.011618611 |
| AC104667.3 | SE | ENSG00000234949_AC104667.3_2_+_238500514_238500674_238499811_238499910_238503582_238504624_1.0,0.538 | 0.231 | Up | 0.00013991 | 0.011699502 |
| BCAS3 | SE | ENSG00000141376_BCAS3_17_+_ 59457866_ 59457932_ 59445687_ 59445855_ 59469337_ 59469543_0.253,0.0 | 0.414 | Up | 0.00014528 | 0.01202122 |
| WRN | SE | ENSG00000165392_WRN_8_+_ 30947980_ 30948048_ 30946405_ 30946481_ 30948349_ 30948458_1.0,1.0 | -0.309 | Down | 0.00014804 | 0.012178606 |
| TMEM25 | SE | ENSG00000149582_TMEM25_11_+_118403631_118403922_118403124_118403176_118404571_118404602_0.88,0.917 | -0.244 | Down | 0.00014896 | 0.012212459 |
| FAM86A | SE | ENSG00000118894_FAM86A_16_-_ 5141794_ 5141896_ 5140084_ 5140566_ 5143484_ 5143565_1.0,0.912 | -0.368 | Down | 0.00015187 | 0.012293937 |
| MTMR14 | SE | ENSG00000163719_MTMR14_3_+_ 9731647_ 9731827_ 9730627_ 9730766_ 9739394_ 9739550_1.0,1.0 | -0.222 | Down | 0.00015362 | 0.012378174 |
| ZNF44 | SE | ENSG00000197857_ZNF44_19_-_ 12404046_ 12404190_ 12386770_ 12386897_ 12405506_ 12405666_0.496,0.7 | -0.413 | Down | 0.00015518 | 0.012397189 |
| GTDC1 | SE | ENSG00000121964_GTDC1_2_-_144728219_144728329_144710339_144710410_144764748_144765102_1.0,1.0 | -0.371 | Down | 0.00015678 | 0.012427156 |
| PEX10 | SE | ENSG00000157911_PEX10_1_-_ 2342068_ 2342307_ 2341809_ 2341890_ 2343829_ 2343953_0.227,0.109 | 0.265 | Up | 0.00015636 | 0.012427156 |
| TMEM241 | SE | ENSG00000134490_TMEM241_18_-_ 20950179_ 20950225_ 20936557_ 20936627_ 20951385_ 20951434_0.238,0.231 | 0.441 | Up | 0.00016864 | 0.013191699 |
| SPG11 | SE | ENSG00000104133_SPG11_15_-_ 44881449_ 44881612_ 44878035_ 44878048_ 44884528_ 44884636_0.775,0.769 | 0.228 | Up | 0.00016946 | 0.013191699 |
| DMTF1 | SE | ENSG00000135164_DMTF1_7_+_ 86783705_ 86783844_ 86781755_ 86781871_ 86792810_ 86792933_1.0,0.6 | -0.601 | Down | 0.00017169 | 0.013297198 |
| SLC1A3 | SE | ENSG00000079215_SLC1A3_5_+_ 36683965_ 36684100_ 36680496_ 36680691_ 36686166_ 36688436_1.0,1.0 | -0.24 | Down | 0.00017423 | 0.01342611 |
| SYNE4 | SE | ENSG00000181392_SYNE4_19_-_ 36497324_ 36497573_ 36496234_ 36496339_ 36499118_ 36499269_0.323,0.301 | 0.569 | Up | 0.00017844 | 0.013715856 |
| LPHN1 | SE | ENSG00000072071_LPHN1_19_-_ 14275432_ 14275517_ 14273759_ 14274218_ 14277827_ 14277842_1.0,0.756 | -0.482 | Down | 0.00018109 | 0.013883955 |
| NEDD1 | SE | ENSG00000139350_NEDD1_12_+_ 97311398_ 97311515_ 97301381_ 97301634_ 97313762_ 97313896_1.0,1.0 | -0.243 | Down | 0.00018702 | 0.014120113 |
| UBA1 | SE | ENSG00000130985_UBA1_X_+_ 47057565_ 47057754_ 47053235_ 47053423_ 47058201_ 47058318_0.0,0.05 | 0.278 | Up | 0.00018665 | 0.014120113 |
| GNB1 | SE | ENSG00000078369_GNB1_1_-_ 1771067_ 1771121_ 1770628_ 1770677_ 1821802_ 1821840_0.0,0.194 | 0.534 | Up | 0.00018906 | 0.014201166 |
| FAM222B | SE | ENSG00000173065_FAM222B_17_-_ 27161310_ 27161344_ 27117395_ 27117443_ 27169699_ 27169808_0.707,0.211 | 0.474 | Up | 0.00019021 | 0.014225002 |
| DNAH14 | SE | ENSG00000185842_DNAH14_1_+_225465111_225465204_225463615_225463783_225477586_225477784_1.0,0.545 | -0.772 | Down | 0.0001939 | 0.014465433 |
| MKL1 | SE | ENSG00000196588_MKL1_22_-_ 40990677_ 40990739_ 40948109_ 40948371_ 41032481_ 41032695_1.0,1.0 | -0.27 | Down | 0.00020153 | 0.014859954 |
| AASS | SE | ENSG00000008311_AASS_7_-_121722841_121722945_121721553_121721649_121726065_121726233_0.0,0.0 | 0.262 | Up | 0.00020372 | 0.014941607 |
| SPOP | SE | ENSG00000121067_SPOP_17_-_ 47714120_ 47714171_ 47700094_ 47700238_ 47745388_ 47745440_1.0,0.814 | -0.426 | Down | 0.00020367 | 0.014941607 |
| SLC9A8 | SE | ENSG00000197818_SLC9A8_20_+_ 48467298_ 48467381_ 48466115_ 48466217_ 48471974_ 48472118_0.238,0.294 | 0.512 | Up | 0.00020959 | 0.015261616 |
| IL15RA | SE | ENSG00000134470_IL15RA_10_-_ 6005705_ 6005801_ 6002357_ 6002530_ 6008107_ 6008302_0.0,0.0 | 0.268 | Up | 0.00021061 | 0.015299457 |
| PPP6R3 | SE | ENSG00000110075_PPP6R3_11_+_ 68326033_ 68326147_ 68315534_ 68315672_ 68334481_ 68334634_1.0,0.687 | -0.564 | Down | 0.00021505 | 0.015392454 |
| ATXN3 | SE | ENSG00000066427_ATXN3_14_-_ 92560089_ 92560194_ 92559595_ 92559662_ 92562436_ 92562481_1.0,0.872 | -0.265 | Down | 0.00021467 | 0.015392454 |
| MLPH | SE | ENSG00000115648_MLPH_2_+_238428552_238428672_238427181_238427291_238434243_238434448_1.0,1.0 | -0.226 | Down | 0.000215 | 0.015392454 |
| MKNK1 | SE | ENSG00000079277_MKNK1_1_-_ 47025905_ 47025949_ 47023090_ 47024472_ 47027149_ 47027314_0.0,0.202 | 0.423 | Up | 0.00021304 | 0.015392454 |
| CMC2 | SE | ENSG00000103121_CMC2_16_-_ 81014374_ 81014484_ 81009698_ 81010076_ 81040338_ 81040500_0.295,0.87 | 0.417 | Up | 0.00021912 | 0.015413511 |
| BOK | SE | ENSG00000176720_BOK_2_+_242498869_242499118_242498135_242498408_242501762_242501891_0.798,1.0 | -0.254 | Down | 0.00022108 | 0.015413511 |
| FAAH2 | SE | ENSG00000165591_FAAH2_X_+_ 57458350_ 57458470_ 57407344_ 57407462_ 57473360_ 57473472_1.0,1.0 | -0.299 | Down | 0.00022026 | 0.015413511 |
| ATG2A | SE | ENSG00000110046_ATG2A_11_-_ 64669987_ 64670152_ 64669731_ 64669858_ 64670759_ 64670836_1.0,1.0 | -0.336 | Down | 0.00022041 | 0.015413511 |
| PAM | SE | ENSG00000145730_PAM_5_+_102360837_102361038_102355493_102355547_102363885_102363942_0.45,0.235 | 0.55 | Up | 0.00021791 | 0.015413511 |
| RTFDC1 | SE | ENSG00000022277_RTFDC1_20_+_ 55045655_ 55045997_ 55043713_ 55043822_ 55046669_ 55046725_1.0,1.0 | -0.456 | Down | 0.00022472 | 0.015421316 |
| UBXN8 | SE | ENSG00000104691_UBXN8_8_+_ 30609023_ 30609035_ 30601706_ 30601794_ 30610551_ 30610622_1.0,1.0 | -0.298 | Down | 0.00022495 | 0.015421316 |
| ACSL1 | SE | ENSG00000151726_ACSL1_4_-_185691408_185691486_185689469_185689604_185694234_185694308_1.0,1.0 | -0.208 | Down | 0.00022692 | 0.015486536 |
| TRAPPC6A | SE | ENSG00000007255_TRAPPC6A_19_-_ 45668384_ 45668452_ 45668110_ 45668228_ 45681392_ 45681495_0.555,0.383 | 0.332 | Up | 0.00023017 | 0.01563822 |
| MPDU1 | SE | ENSG00000129255_MPDU1_17_+_ 7489268_ 7489396_ 7487166_ 7487283_ 7489973_ 7490095_1.0,1.0 | -0.22 | Down | 0.00023091 | 0.015653376 |
| MPDU1 | SE | ENSG00000129255_MPDU1_17_+_ 7489263_ 7489396_ 7487169_ 7487283_ 7489973_ 7490095_1.0,1.0 | -0.206 | Down | 0.00023261 | 0.015725278 |
| LA16c-431H6.6 | SE | ENSG00000261732_LA16c-431H6.6_16_+_ 1716073_ 1716178_ 1715057_ 1715139_ 1716422_ 1716601_0.758,0.752 | -0.436 | Down | 0.00023534 | 0.015777944 |
| UBE2F | SE | ENSG00000184182_UBE2F_2_+_238903385_238903451_238881736_238881867_238933982_238934053_0.0,0.576 | 0.712 | Up | 0.00023514 | 0.015777944 |
| ZIK1 | SE | ENSG00000171649_ZIK1_19_+_ 58096319_ 58096358_ 58095512_ 58095980_ 58099906_ 58100033_0.0,0.0 | 0.326 | Up | 0.00023605 | 0.015791047 |
| MIB2 | SE | ENSG00000197530_MIB2_1_+_ 1560937_ 1561033_ 1560665_ 1560808_ 1562029_ 1562134_1.0,0.939 | -0.207 | Down | 0.00023757 | 0.015798046 |
| ARHGAP44 | SE | ENSG00000006740_ARHGAP44_17_+_ 12877405_ 12877627_ 12862033_ 12862214_ 12883374_ 12883550_1.0,1.0 | -0.48 | Down | 0.00023935 | 0.015868014 |
| COL4A5 | SE | ENSG00000188153_COL4A5_X_+_107816803_107816884_107815040_107815067_107819139_107819202_1.0,1.0 | -0.211 | Down | 0.00024658 | 0.016280436 |
| ATG2A | SE | ENSG00000110046_ATG2A_11_-_ 64669981_ 64670152_ 64669731_ 64669858_ 64670759_ 64670836_1.0,1.0 | -0.333 | Down | 0.0002495 | 0.01643767 |
| AFMID | SE | ENSG00000183077_AFMID_17_+_ 76201683_ 76201819_ 76201520_ 76201599_ 76202026_ 76202131_1.0,0.858 | -0.491 | Down | 0.00025093 | 0.016496325 |
| ZNF586 | SE | ENSG00000083828_ZNF586_19_+_ 58287910_ 58288037_ 58281037_ 58281246_ 58290118_ 58291945_0.526,0.676 | 0.314 | Up | 0.00026167 | 0.016946201 |
| RHBDD1 | SE | ENSG00000144468_RHBDD1_2_+_227702788_227702870_227700670_227700803_227729319_227729781_0.677,1.0 | -0.665 | Down | 0.00027279 | 0.017480226 |
| BCL2L12 | SE | ENSG00000126453_BCL2L12_19_+_ 50172107_ 50172194_ 50169941_ 50170056_ 50176954_ 50177173_1.0,1.0 | -0.506 | Down | 0.00027463 | 0.017481878 |
| LIMK2 | SE | ENSG00000182541_LIMK2_22_+_ 31621705_ 31621805_ 31608280_ 31608410_ 31654276_ 31654412_0.777,0.425 | 0.315 | Up | 0.0002751 | 0.017481878 |
| DSN1 | SE | ENSG00000149636_DSN1_20_-_ 35399275_ 35399380_ 35396371_ 35396445_ 35399827_ 35399876_0.881,1.0 | -0.201 | Down | 0.00028546 | 0.018026422 |
| TRAF3 | SE | ENSG00000131323_TRAF3_14_+_103357661_103357754_103342694_103342862_103363597_103363738_1.0,1.0 | -0.208 | Down | 0.00029457 | 0.018486887 |
| STAU1 | SE | ENSG00000124214_STAU1_20_-_ 47774973_ 47775034_ 47770469_ 47770608_ 47775475_ 47775683_0.41,0.0 | 0.795 | Up | 0.00029693 | 0.018558129 |
| ASPM | SE | ENSG00000066279_ASPM_1_-_197069560_197074315_197065127_197065294_197086918_197087113_0.691,0.605 | 0.238 | Up | 0.00030034 | 0.01869497 |
| CTC1 | SE | ENSG00000178971_CTC1_17_-_ 8139148_ 8139277_ 8138370_ 8138603_ 8139375_ 8139660_0.862,0.548 | 0.258 | Up | 0.00030247 | 0.018788729 |
| PVR | SE | ENSG00000073008_PVR_19_+_ 45162009_ 45162168_ 45161029_ 45161178_ 45164558_ 45164590_0.766,1.0 | -0.208 | Down | 0.00030321 | 0.018796783 |
| PLA2G7 | SE | ENSG00000146070_PLA2G7_6_-_ 46677063_ 46677155_ 46675727_ 46675898_ 46678281_ 46678395_1.0,1.0 | -0.22 | Down | 0.00030415 | 0.018816374 |
| PTPN4 | SE | ENSG00000088179_PTPN4_2_+_120677644_120677817_120672754_120672818_120689999_120690125_1.0,1.0 | -0.223 | Down | 0.00030661 | 0.018930284 |
| DPH7 | SE | ENSG00000148399_DPH7_9_-_140470760_140470854_140470531_140470619_140471921_140472055_1.0,1.0 | -0.347 | Down | 0.00031741 | 0.019412536 |
| PORCN | SE | ENSG00000102312_PORCN_X_+_ 48367811_ 48367965_ 48367417_ 48367491_ 48368171_ 48368344_1.0,1.0 | -0.511 | Down | 0.00031761 | 0.019412536 |
| ILF3 | SE | ENSG00000129351_ILF3_19_+_ 10795091_ 10795152_ 10794592_ 10794646_ 10798021_ 10798384_0.958,0.842 | -0.227 | Down | 0.00032259 | 0.01967734 |
| UNC119 | SE | ENSG00000109103_UNC119_17_-_ 26875609_ 26875723_ 26873725_ 26874867_ 26879355_ 26879686_1.0,1.0 | -0.248 | Down | 0.00032367 | 0.019703701 |
| STAP2 | SE | ENSG00000178078_STAP2_19_-_ 4328671_ 4328806_ 4327312_ 4327382_ 4329957_ 4330058_0.893,0.794 | -0.228 | Down | 0.00032993 | 0.019965194 |
| ANKS6 | SE | ENSG00000165138_ANKS6_9_-_101552385_101552888_101547113_101547158_101558414_101558821_0.752,1.0 | -0.342 | Down | 0.00033248 | 0.019980278 |
| SAC3D1 | SE | ENSG00000168061_SAC3D1_11_+_ 64810496_ 64810636_ 64808412_ 64808578_ 64811696_ 64812300_1.0,1.0 | -0.21 | Down | 0.00033217 | 0.019980278 |
| PAQR3 | SE | ENSG00000163291_PAQR3_4_-_ 79843294_ 79843575_ 79839093_ 79841835_ 79843982_ 79844137_0.249,0.398 | 0.676 | Up | 0.00033666 | 0.020092867 |
| BAZ2B | SE | ENSG00000123636_BAZ2B_2_-_160287373_160287667_160285710_160285771_160289267_160292064_1.0,1.0 | -0.253 | Down | 0.00034329 | 0.020448112 |
| ZNF83 | SE | ENSG00000167766_ZNF83_19_-_ 53177434_ 53177506_ 53164014_ 53164096_ 53193695_ 53193749_0.725,0.116 | -0.42 | Down | 0.00035528 | 0.020998114 |
| BAD | SE | ENSG00000002330_BAD_11_-_ 64044375_ 64044515_ 64039084_ 64039275_ 64051653_ 64051848_0.262,0.374 | -0.285 | Down | 0.00035887 | 0.021169057 |
| MYO9A | SE | ENSG00000066933_MYO9A_15_-_ 72244117_ 72244237_ 72231192_ 72231268_ 72252241_ 72252296_0.3,0.392 | 0.478 | Up | 0.00036226 | 0.021204971 |
| ZHX3 | SE | ENSG00000174306_ZHX3_20_-_ 39896102_ 39896252_ 39868237_ 39868344_ 39897629_ 39897723_1.0,1.0 | -0.245 | Down | 0.00036036 | 0.021204971 |
| WIBG | SE | ENSG00000170473_WIBG_12_-_ 56308059_ 56308150_ 56297170_ 56297264_ 56320859_ 56320895_1.0,0.547 | -0.5 | Down | 0.00037007 | 0.021537541 |
| YAF2 | SE | ENSG00000015153_YAF2_12_-_ 42604156_ 42604256_ 42555429_ 42555567_ 42604349_ 42604482_0.84,1.0 | -0.511 | Down | 0.00037493 | 0.02173745 |
| PARD3 | SE | ENSG00000148498_PARD3_10_-_ 34625126_ 34625171_ 34620044_ 34620272_ 34626202_ 34626354_1.0,1.0 | -0.5 | Down | 0.0003804 | 0.021894974 |
| ARNTL2 | SE | ENSG00000029153_ARNTL2_12_+_ 27529278_ 27529320_ 27523061_ 27523163_ 27533179_ 27533337_0.204,0.0 | 0.464 | Up | 0.00038504 | 0.022030056 |
| GOSR2 | SE | ENSG00000108433_GOSR2_17_+_ 45008467_ 45008573_ 45006885_ 45006950_ 45009432_ 45009565_0.694,0.586 | 0.265 | Up | 0.0003874 | 0.022040598 |
| LIN7A | SE | ENSG00000111052_LIN7A_12_-_ 81283029_ 81283148_ 81242029_ 81242101_ 81331419_ 81331483_1.0,0.59 | 0.205 | Up | 0.00038859 | 0.022066721 |
| SERTAD3 | SE | ENSG00000167565_SERTAD3_19_-_ 40948229_ 40948422_ 40947712_ 40947993_ 40950121_ 40950182_0.065,0.0 | 0.211 | Up | 0.0003971 | 0.022466554 |
| SRFBP1 | SE | ENSG00000151304_SRFBP1_5_+_121358064_121358102_121330293_121330365_121362636_121364314_1.0,0.519 | 0.24 | Up | 0.00039875 | 0.022471114 |
| TRIM16 | SE | ENSG00000221926_TRIM16_17_-_ 15586167_ 15586278_ 15584178_ 15584267_ 15586349_ 15586471_1.0,1.0 | -0.424 | Down | 0.00040389 | 0.022532961 |
| ERBB2IP | SE | ENSG00000112851_ERBB2IP_5_+_ 65364704_ 65364848_ 65349233_ 65350779_ 65367996_ 65368122_1.0,0.663 | -0.569 | Down | 0.00040285 | 0.022532961 |
| LPXN | SE | ENSG00000110031_LPXN_11_-_ 58331627_ 58331674_ 58322313_ 58322413_ 58338028_ 58338186_0.9,1.0 | -0.276 | Down | 0.00040868 | 0.022699599 |
| PDCD2L | SE | ENSG00000126249_PDCD2L_19_+_ 34895553_ 34895895_ 34895329_ 34895443_ 34900065_ 34900415_0.514,1.0 | 0.243 | Up | 0.00041114 | 0.022719953 |
| ESPL1 | SE | ENSG00000135476_ESPL1_12_+_ 53682321_ 53682483_ 53681755_ 53682125_ 53682873_ 53683087_1.0,1.0 | -0.204 | Down | 0.00041129 | 0.022719953 |
| SOS2 | SE | ENSG00000100485_SOS2_14_-_ 50682091_ 50682150_ 50671001_ 50671127_ 50697914_ 50698080_0.0,0.0 | 0.352 | Up | 0.00041721 | 0.023005634 |
| BCL6 | SE | ENSG00000113916_BCL6_3_-_187444518_187444686_187443286_187443417_187446147_187446332_1.0,1.0 | -0.209 | Down | 0.00044263 | 0.023912544 |
| FUK | SE | ENSG00000157353_FUK_16_+_ 70500784_ 70501374_ 70500034_ 70500160_ 70502751_ 70502871_0.433,0.276 | 0.645 | Up | 0.00044547 | 0.023957921 |
| C1orf86 | SE | ENSG00000162585_C1orf86_1_-_ 2118276_ 2118645_ 2115916_ 2116952_ 2125077_ 2125349_1.0,0.732 | -0.509 | Down | 0.00046911 | 0.024744426 |
| MAPT | SE | ENSG00000186868_MAPT_17_+_ 44049224_ 44049311_ 44039686_ 44039836_ 44055740_ 44055806_1.0,1.0 | -0.3 | Down | 0.00047356 | 0.024809393 |
| SYNE4 | SE | ENSG00000181392_SYNE4_19_-_ 36498026_ 36498170_ 36496234_ 36496339_ 36499118_ 36499269_0.396,0.228 | 0.567 | Up | 0.00047352 | 0.024809393 |
| BIN1 | SE | ENSG00000136717_BIN1_2_-_127808729_127808819_127808377_127808488_127815048_127815177_0.845,1.0 | -0.251 | Down | 0.00047978 | 0.025092201 |
| TSGA10 | SE | ENSG00000135951_TSGA10_2_-_ 99735013_ 99735149_ 99734029_ 99734222_ 99743510_ 99743639_0.0,0.164 | 0.214 | Up | 0.00048601 | 0.025244438 |
| PGAP2 | SE | ENSG00000148985_PGAP2_11_+_ 3844842_ 3844970_ 3829523_ 3829545_ 3845112_ 3845587_1.0,1.0 | -0.324 | Down | 0.00048544 | 0.025244438 |
| RAB8B | SE | ENSG00000166128_RAB8B_15_+_ 63516046_ 63516178_ 63515240_ 63515272_ 63536954_ 63537015_0.435,0.461 | 0.411 | Up | 0.00048499 | 0.025244438 |
| BLOC1S6 | SE | ENSG00000104164_BLOC1S6_15_+_ 45893431_ 45893605_ 45884332_ 45884474_ 45897625_ 45897712_1.0,1.0 | -0.238 | Down | 0.00049471 | 0.025384594 |
| LRP5 | SE | ENSG00000162337_LRP5_11_+_ 68213040_ 68213154_ 68207340_ 68207384_ 68213903_ 68214001_0.048,0.0 | 0.251 | Up | 0.00049403 | 0.025384594 |
| ENOX2 | SE | ENSG00000165675_ENOX2_X_-_129917520_129917664_129843216_129843305_130035657_130035705_0.663,0.88 | 0.228 | Up | 0.00051209 | 0.026065336 |
| ZNF397 | SE | ENSG00000186812_ZNF397_18_+_ 32825225_ 32825315_ 32823115_ 32823257_ 32834195_ 32834366_0.378,0.378 | 0.396 | Up | 0.0005136 | 0.026098404 |
| SLC35B3 | SE | ENSG00000124786_SLC35B3_6_-_ 8417634_ 8417727_ 8417116_ 8417228_ 8420953_ 8421061_1.0,1.0 | -0.219 | Down | 0.00051859 | 0.026119786 |
| PCCA | SE | ENSG00000175198_PCCA_13_+_101167680_101167821_101101505_101101559_101179928_101180006_1.0,1.0 | -0.22 | Down | 0.0005266 | 0.026276246 |
| TMEM206 | SE | ENSG00000065600_TMEM206_1_-_212550903_212551048_212537823_212538718_212553236_212553379_1.0,1.0 | -0.218 | Down | 0.00053302 | 0.026509961 |
| MTL5 | SE | ENSG00000132749_MTL5_11_-_ 68512458_ 68512579_ 68509785_ 68509862_ 68514675_ 68514834_1.0,0.933 | -0.209 | Down | 0.00054649 | 0.02692269 |
| CMC2 | SE | ENSG00000103121_CMC2_16_-_ 81015410_ 81015482_ 81009697_ 81010076_ 81040338_ 81040502_0.644,0.888 | 0.234 | Up | 0.00054999 | 0.027000961 |
| SNX10 | SE | ENSG00000086300_SNX10_7_+_ 26393676_ 26393804_ 26386039_ 26386086_ 26396626_ 26396747_0.342,0.0 | 0.679 | Up | 0.00055264 | 0.027014163 |
| PLCB4 | SE | ENSG00000101333_PLCB4_20_+_ 9457363_ 9457400_ 9453925_ 9454012_ 9459567_ 9461889_1.0,1.0 | -0.217 | Down | 0.00055427 | 0.027014163 |
| PIP5K1C | SE | ENSG00000186111_PIP5K1C_19_-_ 3633434_ 3633518_ 3630180_ 3633167_ 3638881_ 3639014_0.294,0.257 | -0.243 | Down | 0.00056058 | 0.027256868 |
| C19orf60 | SE | ENSG00000006015_C19orf60_19_+_ 18700222_ 18700493_ 18699804_ 18699887_ 18702917_ 18703146_1.0,1.0 | -0.228 | Down | 0.00056518 | 0.027437058 |
| PLEKHN1 | SE | ENSG00000187583_PLEKHN1_1_+_ 908565_ 908706_ 908240_ 908390_ 908879_ 909020_1.0,1.0 | -0.286 | Down | 0.00056915 | 0.027562587 |
| PDCD2L | SE | ENSG00000126249_PDCD2L_19_+_ 34895553_ 34895720_ 34895288_ 34895443_ 34900065_ 34900415_0.454,1.0 | 0.273 | Up | 0.00057617 | 0.027749389 |
| TMEM175 | SE | ENSG00000127419_TMEM175_4_+_ 941496_ 941680_ 926248_ 926328_ 944208_ 944306_0.418,0.601 | 0.4 | Up | 0.00058677 | 0.028092469 |
| LPP | SE | ENSG00000145012_LPP_3_+_187943192_187943315_187871718_187871809_188123899_188124101_0.469,0.761 | 0.342 | Up | 0.00058699 | 0.028092469 |
| DCAF8 | SE | ENSG00000132716_DCAF8_1_-_160231074_160231148_160213749_160213824_160231906_160232241_0.878,0.825 | -0.205 | Down | 0.00058838 | 0.028114847 |
| STK19 | SE | ENSG00000204344_STK19_6_+_ 31940397_ 31940534_ 31940078_ 31940288_ 31946679_ 31946775_1.0,1.0 | -0.228 | Down | 0.00059907 | 0.028402433 |
| ATG9A | SE | ENSG00000198925_ATG9A_2_-_220093155_220093204_220092643_220092775_220093731_220094047_0.425,0.663 | 0.405 | Up | 0.00060424 | 0.028514443 |
| UBR1 | SE | ENSG00000159459_UBR1_15_-_ 43339358_ 43339487_ 43335411_ 43335593_ 43346939_ 43347097_0.757,1.0 | -0.289 | Down | 0.0006196 | 0.028930808 |
| MRPL22 | SE | ENSG00000082515_MRPL22_5_+_154330362_154330498_154320776_154320825_154335930_154335996_1.0,0.901 | -0.205 | Down | 0.00063595 | 0.029373205 |
| PAM | SE | ENSG00000145730_PAM_5_+_102360834_102361038_102355493_102355547_102363885_102363942_0.739,0.527 | 0.321 | Up | 0.00066099 | 0.030118626 |
| BIRC5 | SE | ENSG00000089685_BIRC5_17_+_ 76212046_ 76212862_ 76210760_ 76210870_ 76218908_ 76219060_1.0,1.0 | -0.365 | Down | 0.00067874 | 0.03078911 |
| HELB | SE | ENSG00000127311_HELB_12_+_ 66707765_ 66707943_ 66703485_ 66704388_ 66709021_ 66709163_0.305,1.0 | 0.348 | Up | 0.00071002 | 0.032017299 |
| GOPC | SE | ENSG00000047932_GOPC_6_-_117892022_117892118_117888016_117888197_117894629_117894795_1.0,1.0 | -0.202 | Down | 0.00071232 | 0.032029787 |
| CBR3-AS1 | SE | ENSG00000236830_CBR3-AS1_21_-_ 37518553_ 37518653_ 37504064_ 37505372_ 37528514_ 37528615_1.0,1.0 | -0.242 | Down | 0.00071701 | 0.032141841 |
| PGAP3 | SE | ENSG00000161395_PGAP3_17_-_ 37840849_ 37841002_ 37830869_ 37830932_ 37842174_ 37842272_1.0,0.588 | 0.206 | Up | 0.00071927 | 0.032195789 |
| ATP2C1 | SE | ENSG00000017260_ATP2C1_3_+_130613574_130613619_130613025_130613181_130649259_130649370_0.751,1.0 | -0.254 | Down | 0.00074016 | 0.032889205 |
| CDC14B | SE | ENSG00000081377_CDC14B_9_-_ 99277930_ 99278074_ 99265846_ 99266071_ 99284787_ 99284885_1.0,1.0 | -0.289 | Down | 0.00074787 | 0.033143265 |
| SYNE4 | SE | ENSG00000181392_SYNE4_19_-_ 36497651_ 36497846_ 36496234_ 36496339_ 36499118_ 36499269_0.0,0.294 | 0.674 | Up | 0.00074806 | 0.033143265 |
| C14orf159 | SE | ENSG00000133943_C14orf159_14_+_ 91636346_ 91636530_ 91633568_ 91633722_ 91639632_ 91639783_1.0,1.0 | -0.5 | Down | 0.00076281 | 0.033434632 |
| SEMA4D | SE | ENSG00000187764_SEMA4D_9_-_ 91996088_ 91996261_ 91995969_ 91996013_ 92001281_ 92001397_1.0,1.0 | -0.234 | Down | 0.00079781 | 0.03464141 |
| RUFY2 | SE | ENSG00000204130_RUFY2_10_-_ 70140988_ 70141156_ 70139180_ 70139278_ 70143554_ 70143671_1.0,0.941 | -0.209 | Down | 0.00081924 | 0.035071797 |
| UBE2V1 | SE | ENSG00000244687_UBE2V1_20_-_ 48732021_ 48732158_ 48713208_ 48713357_ 48732235_ 48732491_1.0,1.0 | -0.214 | Down | 0.00082326 | 0.035194353 |
| PPT2 | SE | ENSG00000221988_PPT2_6_+_ 32122806_ 32122960_ 32122363_ 32122554_ 32123464_ 32123560_1.0,1.0 | -0.275 | Down | 0.0008343 | 0.035221019 |
| GLS | SE | ENSG00000115419_GLS_2_+_191819309_191819386_191818290_191818352_191827555_191827896_0.659,0.563 | 0.389 | Up | 0.00082632 | 0.035221019 |
| MOK | SE | ENSG00000080823_MOK_14_-_102732159_102732249_102729882_102729953_102749814_102749929_1.0,0.87 | -0.215 | Down | 0.00082731 | 0.035221019 |
| C5orf38 | SE | ENSG00000186493_C5orf38_5_+_ 2753398_ 2753469_ 2752793_ 2752868_ 2755142_ 2755195_0.665,1.0 | -0.296 | Down | 0.00084923 | 0.035653598 |
| AGBL5 | SE | ENSG00000084693_AGBL5_2_+_ 27291915_ 27291962_ 27291499_ 27291612_ 27292440_ 27292574_1.0,0.529 | -0.628 | Down | 0.00086003 | 0.035859749 |
| CLTCL1 | SE | ENSG00000070371_CLTCL1_22_-_ 19175069_ 19175240_ 19170902_ 19171124_ 19175492_ 19175603_1.0,0.0 | 0.5 | Up | 0.00086253 | 0.035878889 |
| CARF | SE | ENSG00000138380_CARF_2_+_203839056_203839219_203836227_203836461_203841991_203842055_1.0,1.0 | -0.326 | Down | 0.00086285 | 0.035878889 |
| ANAPC10 | SE | ENSG00000164162_ANAPC10_4_-_145985723_145985844_145916607_145916755_146002811_146002902_0.762,0.608 | 0.231 | Up | 0.00088773 | 0.036712952 |
| PTK2 | SE | ENSG00000169398_PTK2_8_-_141935759_141935848_141900641_141900868_142011223_142011257_0.119,0.224 | 0.233 | Up | 0.00089051 | 0.036728206 |
| FGFR2 | SE | ENSG00000066468_FGFR2_10_-_123278195_123278343_123276847_123276977_123279492_123279683_0.0,0.195 | 0.394 | Up | 0.00089853 | 0.036865658 |
| SMAP1 | SE | ENSG00000112305_SMAP1_6_+_ 71508359_ 71508440_ 71483052_ 71483128_ 71546643_ 71546731_1.0,0.596 | 0.202 | Up | 0.00092701 | 0.037471894 |
| FAM193B | SE | ENSG00000146067_FAM193B_5_-_176958282_176958522_176951185_176952206_176959443_176959534_1.0,1.0 | -0.278 | Down | 0.00094024 | 0.037855662 |
| ZNF530 | SE | ENSG00000183647_ZNF530_19_+_ 58117053_ 58119195_ 58115644_ 58115774_ 58123870_ 58124090_0.401,1.0 | 0.299 | Up | 0.00093962 | 0.037855662 |
| N4BP2L2 | SE | ENSG00000244754_N4BP2L2_13_-_ 33052023_ 33052185_ 33016524_ 33018263_ 33054726_ 33054774_1.0,0.0 | 0.5 | Up | 0.00094207 | 0.03787939 |
| PTBP2 | SE | ENSG00000117569_PTBP2_1_+_ 97271974_ 97272008_ 97270340_ 97270495_ 97272421_ 97272514_0.898,1.0 | -0.548 | Down | 0.00094393 | 0.037904239 |
| RBM33 | SE | ENSG00000184863_RBM33_7_+_155556502_155556712_155537654_155538296_155559160_155559250_1.0,1.0 | -0.204 | Down | 0.00094778 | 0.037908684 |
| MACROD1 | SE | ENSG00000133315_MACROD1_11_-_ 63766309_ 63766344_ 63766031_ 63766159_ 63766426_ 63766694_0.762,1.0 | -0.268 | Down | 0.00095889 | 0.038152371 |
| TIRAP | SE | ENSG00000150455_TIRAP_11_+_126161319_126161464_126160697_126160856_126162371_126162582_0.395,0.355 | -0.265 | Down | 0.00096147 | 0.038155592 |
| SRSF11 | SE | ENSG00000116754_SRSF11_1_+_ 70696239_ 70696301_ 70694104_ 70694238_ 70696777_ 70697253_0.708,0.717 | -0.403 | Down | 0.00097089 | 0.038230055 |
| GRK5 | SE | ENSG00000198873_GRK5_10_+_121201510_121201600_121199242_121199280_121203055_121203264_1.0,1.0 | -0.262 | Down | 0.00096795 | 0.038230055 |
| CENPE | SE | ENSG00000138778_CENPE_4_-_104060945_104061236_104059507_104059606_104061412_104061571_1.0,1.0 | -0.35 | Down | 0.00097459 | 0.038326461 |
| KCNAB2 | SE | ENSG00000069424_KCNAB2_1_+_ 6101890_ 6101932_ 6100576_ 6100705_ 6132814_ 6132858_0.434,0.184 | 0.372 | Up | 0.00097809 | 0.038414457 |
| ATG9A | SE | ENSG00000198925_ATG9A_2_-_220093155_220093207_220092643_220092775_220093731_220094062_0.522,0.773 | 0.328 | Up | 0.00098663 | 0.038666886 |
| WDR27 | SE | ENSG00000184465_WDR27_6_-_170089222_170089404_170088912_170089108_170101646_170102144_0.796,1.0 | -0.386 | Down | 0.00100093 | 0.039009472 |
| RAB28 | SE | ENSG00000157869_RAB28_4_-_ 13371494_ 13371589_ 13369347_ 13370274_ 13378168_ 13378246_0.123,0.073 | 0.237 | Up | 0.00099981 | 0.039009472 |
| TEP1 | SE | ENSG00000129566_TEP1_14_-_ 20874391_ 20874559_ 20873609_ 20873744_ 20876031_ 20876622_1.0,1.0 | -0.273 | Down | 0.0010085 | 0.039203944 |
| C11orf54 | SE | ENSG00000182919_C11orf54_11_+_ 93475128_ 93475260_ 93474853_ 93474894_ 93480467_ 93480614_0.506,0.0 | 0.416 | Up | 0.0010112 | 0.039258699 |
| OSBPL6 | SE | ENSG00000079156_OSBPL6_2_+_179188903_179188996_179170756_179171013_179192982_179193105_1.0,0.906 | -0.301 | Down | 0.00101336 | 0.039292706 |
| CNOT2 | SE | ENSG00000111596_CNOT2_12_+_ 70726546_ 70726626_ 70713077_ 70713144_ 70729217_ 70729343_0.745,0.846 | -0.265 | Down | 0.0010155 | 0.039325587 |
| KLHDC9 | SE | ENSG00000162755_KLHDC9_1_+_161069387_161069586_161068455_161068852_161069850_161070133_0.832,0.759 | 0.205 | Up | 0.00102015 | 0.039405163 |
| AFMID | SE | ENSG00000183077_AFMID_17_+_ 76201683_ 76201834_ 76201520_ 76201599_ 76202026_ 76202131_1.0,0.657 | -0.422 | Down | 0.00103436 | 0.039801927 |
| SSBP2 | SE | ENSG00000145687_SSBP2_5_-_ 80724403_ 80724502_ 80716106_ 80716352_ 80733248_ 80733649_0.559,1.0 | 0.22 | Up | 0.00105318 | 0.040221859 |
| NT5DC3 | SE | ENSG00000111696_NT5DC3_12_-_104179348_104179525_104179112_104179253_104181218_104181305_0.423,0.18 | -0.266 | Down | 0.00105206 | 0.040221859 |
| STK19 | SE | ENSG00000204344_STK19_6_+_ 31940397_ 31940696_ 31940128_ 31940288_ 31946679_ 31946775_1.0,1.0 | -0.358 | Down | 0.00105205 | 0.040221859 |
| PEX7 | SE | ENSG00000112357_PEX7_6_+_137191027_137191141_137147456_137147607_137219279_137219379_0.524,0.216 | 0.63 | Up | 0.0010566 | 0.040301714 |
| PPP1R7 | SE | ENSG00000115685_PPP1R7_2_+_242089673_242089962_242089052_242089123_242092890_242093019_1.0,1.0 | -0.262 | Down | 0.00107757 | 0.040794732 |
| AP3S2 | SE | ENSG00000157823_AP3S2_15_-_ 90421496_ 90421532_ 90380846_ 90380954_ 90431752_ 90431864_0.284,0.166 | 0.497 | Up | 0.00109422 | 0.041146706 |
| MARCH7 | SE | ENSG00000136536_MARCH7_2_+_160572191_160572277_160569017_160569172_160585519_160585686_0.0,0.081 | 0.212 | Up | 0.00109669 | 0.041146706 |
| ABHD6 | SE | ENSG00000163686_ABHD6_3_+_ 58235604_ 58235669_ 58223232_ 58223643_ 58242288_ 58242432_0.505,0.505 | 0.382 | Up | 0.00109724 | 0.041146706 |
| MRPS15 | SE | ENSG00000116898_MRPS15_1_-_ 36926864_ 36926913_ 36923523_ 36923582_ 36929406_ 36929451_0.597,1.0 | -0.451 | Down | 0.00113817 | 0.042067291 |
| RNF185 | SE | ENSG00000138942_RNF185_22_+_ 31591454_ 31591567_ 31588669_ 31588688_ 31592921_ 31593143_0.713,0.734 | 0.276 | Up | 0.00113497 | 0.042067291 |
| PNPLA8 | SE | ENSG00000135241_PNPLA8_7_-_108161919_108161965_108154879_108156018_108166472_108166568_1.0,0.762 | -0.485 | Down | 0.00114767 | 0.042291671 |
| RP11-480I12.5 | SE | ENSG00000214796_RP11-480I12.5_1_-_202828009_202828230_202820955_202822408_202830575_202830736_1.0,1.0 | -0.317 | Down | 0.00116945 | 0.042783258 |
| NUP214 | SE | ENSG00000126883_NUP214_9_+_134064439_134064518_134053697_134053797_134070619_134070681_0.489,0.389 | 0.561 | Up | 0.00117357 | 0.042814613 |
| CCDC148 | SE | ENSG00000153237_CCDC148_2_-_159196753_159196905_159195501_159195597_159197109_159197192_1.0,1.0 | -0.213 | Down | 0.00117453 | 0.042814613 |
| NME6 | SE | ENSG00000172113_NME6_3_-_ 48341920_ 48342124_ 48339916_ 48340013_ 48342768_ 48342795_1.0,1.0 | -0.5 | Down | 0.0011778 | 0.042831467 |
| MFGE8 | SE | ENSG00000140545_MFGE8_15_-_ 89442886_ 89443042_ 89441915_ 89442763_ 89444781_ 89444966_0.32,0.397 | 0.425 | Up | 0.00117695 | 0.042831467 |
| GOLIM4 | SE | ENSG00000173905_GOLIM4_3_-_167758573_167758657_167754623_167754782_167759179_167759262_0.802,0.734 | -0.228 | Down | 0.0011889 | 0.043108727 |
| MCTP1 | SE | ENSG00000175471_MCTP1_5_-_ 94253600_ 94253678_ 94248510_ 94248681_ 94259666_ 94259726_1.0,0.719 | -0.408 | Down | 0.00119881 | 0.043336704 |
| ALDOA | SE | ENSG00000149925_ALDOA_16_+_ 30066492_ 30066648_ 30064447_ 30064820_ 30075049_ 30075569_0.32,0.0 | 0.651 | Up | 0.00120235 | 0.043352453 |
| SERINC3 | SE | ENSG00000132824_SERINC3_20_-_ 43138531_ 43138669_ 43133441_ 43133532_ 43142519_ 43142681_1.0,1.0 | -0.5 | Down | 0.00120864 | 0.043416728 |
| PVR | SE | ENSG00000073008_PVR_19_+_ 45162009_ 45162033_ 45161029_ 45161178_ 45164558_ 45164590_0.46,1.0 | -0.238 | Down | 0.00122309 | 0.043538752 |
| TMCC1 | SE | ENSG00000172765_TMCC1_3_-_129551616_129551669_129390091_129390107_129599151_129599309_1.0,1.0 | -0.312 | Down | 0.00122664 | 0.04356661 |
| SLC29A1 | SE | ENSG00000112759_SLC29A1_6_+_ 44193709_ 44193904_ 44191350_ 44191378_ 44194999_ 44195079_0.529,0.375 | -0.236 | Down | 0.00123419 | 0.043732636 |
| NAA16 | SE | ENSG00000172766_NAA16_13_+_ 41936866_ 41937009_ 41936261_ 41936295_ 41941574_ 41941788_0.496,1.0 | -0.502 | Down | 0.00126358 | 0.044360691 |
| ARHGEF10 | SE | ENSG00000104728_ARHGEF10_8_+_ 1828213_ 1828330_ 1824736_ 1824900_ 1830800_ 1830915_0.449,0.0 | 0.461 | Up | 0.00127144 | 0.044533897 |
| RIMS1 | SE | ENSG00000079841_RIMS1_6_+_ 72975662_ 72975752_ 72974677_ 72974755_ 72993749_ 72993821_1.0,1.0 | -0.5 | Down | 0.00128664 | 0.044911576 |
| JADE2 | SE | ENSG00000043143_JADE2_5_+_133909334_133909452_133901805_133902270_133912457_133912586_0.448,0.748 | 0.402 | Up | 0.00132737 | 0.045755769 |
| AGR2 | SE | ENSG00000106541_AGR2_7_-_ 16851288_ 16851379_ 16841281_ 16841427_ 16872879_ 16873057_0.377,0.232 | 0.58 | Up | 0.00134193 | 0.045923128 |
| CD163L1 | SE | ENSG00000177675_CD163L1_12_-_ 7520682_ 7520793_ 7509975_ 7510082_ 7521528_ 7521561_1.0,0.796 | -0.313 | Down | 0.00133713 | 0.045923128 |
| SECISBP2 | SE | ENSG00000187742_SECISBP2_9_+_ 91934566_ 91934712_ 91933420_ 91933527_ 91940341_ 91940591_1.0,1.0 | -0.351 | Down | 0.00134039 | 0.045923128 |
| CBWD2 | SE | ENSG00000136682_CBWD2_2_+_114228609_114228666_114222705_114222750_114239753_114239805_0.886,1.0 | -0.223 | Down | 0.00134868 | 0.045974784 |
| SPIN1 | SE | ENSG00000106723_SPIN1_9_+_ 91063855_ 91063904_ 91003344_ 91003453_ 91083286_ 91083520_0.721,0.526 | 0.377 | Up | 0.0013521 | 0.045983493 |
| CXADR | SE | ENSG00000154639_CXADR_21_+_ 18933019_ 18933142_ 18931293_ 18931449_ 18937745_ 18942418_0.895,0.873 | -0.35 | Down | 0.00135401 | 0.045996954 |
| RP11-529K1.2 | SE | ENSG00000261777_RP11-529K1.2_16_-_ 70375842_ 70376002_ 70367685_ 70367863_ 70380101_ 70380650_0.189,0.582 | 0.615 | Up | 0.00136743 | 0.046224553 |
| ZNF620 | SE | ENSG00000177842_ZNF620_3_+_ 40553892_ 40554006_ 40552960_ 40553087_ 40557350_ 40557435_0.397,0.355 | -0.316 | Down | 0.00139477 | 0.046601626 |
| CD163L1 | SE | ENSG00000177675_CD163L1_12_-_ 7520653_ 7520793_ 7509975_ 7510082_ 7521528_ 7521566_1.0,0.764 | -0.439 | Down | 0.0013948 | 0.046601626 |
| PER1 | SE | ENSG00000179094_PER1_17_-_ 8048077_ 8048311_ 8046583_ 8047194_ 8049275_ 8049455_1.0,1.0 | -0.349 | Down | 0.00139963 | 0.046661458 |
| MAGI1 | SE | ENSG00000151276_MAGI1_3_-_ 65433696_ 65433732_ 65428466_ 65428524_ 65438932_ 65439015_0.254,0.665 | -0.391 | Down | 0.00140765 | 0.04687754 |
| REPS1 | SE | ENSG00000135597_REPS1_6_-_139247537_139247618_139242173_139242261_139251113_139251235_0.367,0.269 | 0.295 | Up | 0.00142463 | 0.047339289 |
| MACF1 | SE | ENSG00000127603_MACF1_1_+_ 39930766_ 39930784_ 39929283_ 39929358_ 39934286_ 39934404_0.683,0.596 | -0.299 | Down | 0.00142675 | 0.047358094 |
| PLS1 | SE | ENSG00000120756_PLS1_3_+_142338294_142338480_142316078_142316190_142383043_142383149_0.0,0.097 | 0.573 | Up | 0.00146836 | 0.048372332 |
| RTFDC1 | SE | ENSG00000022277_RTFDC1_20_+_ 55046669_ 55046725_ 55043734_ 55043822_ 55047381_ 55047471_0.0,0.0 | 0.294 | Up | 0.00149105 | 0.048955876 |
| ELP2 | SE | ENSG00000134759_ELP2_18_+_ 33721099_ 33721164_ 33718232_ 33718389_ 33734812_ 33734962_1.0,1.0 | -0.423 | Down | 0.00149258 | 0.048955876 |
| FBF1 | SE | ENSG00000188878_FBF1_17_-_ 73931712_ 73931754_ 73929075_ 73929169_ 73933646_ 73933675_0.697,0.365 | 0.395 | Up | 0.00149824 | 0.04908879 |
| SLC38A1 | SE | ENSG00000111371_SLC38A1_12_-_ 46648596_ 46648719_ 46633461_ 46633676_ 46662308_ 46662780_0.347,0.0 | 0.268 | Up | 0.00150737 | 0.049334854 |
| NAT1 | SE | ENSG00000171428_NAT1_8_+_ 18068701_ 18068851_ 18067617_ 18067689_ 18069899_ 18070283_0.325,1.0 | -0.662 | Down | 0.00153719 | 0.049891357 |
| EML3 | A3SS | ENSG00000149499_EML3_11_-_ 62378558_ 62378819_ 62378558_ 62378816_ 62378896_ 62379068_1.0,1.0 | -1 | Down | 4.35E-11 | 1.56E-07 |
| SUGP1 | A3SS | ENSG00000105705_SUGP1_19_-_ 19414532_ 19414852_ 19414532_ 19414721_ 19416657_ 19416885_1.0,1.0 | -0.851 | Down | 7.41E-10 | 1.33E-06 |
| PILRB | A3SS | ENSG00000121716_PILRB_7_+_ 99954016_ 99954506_ 99954372_ 99954506_ 99952765_ 99952863_1.0,1.0 | -0.649 | Down | 2.29E-08 | 2.74E-05 |
| DMXL2 | A3SS | ENSG00000104093_DMXL2_15_-_ 51768785_ 51768916_ 51768785_ 51768913_ 51770467_ 51770544_1.0,1.0 | -0.644 | Down | 5.46E-08 | 4.91E-05 |
| NPEPPS | A3SS | ENSG00000141279_NPEPPS_17_+_ 45654410_ 45654526_ 45654446_ 45654526_ 45646782_ 45646860_1.0,1.0 | -0.734 | Down | 7.30E-08 | 5.25E-05 |
| C5orf45 | A3SS | ENSG00000161010_C5orf45_5_-_179264275_179267959_179264275_179264885_179268906_179269064_1.0,1.0 | -0.475 | Down | 5.31E-07 | 0.000239008 |
| SMYD2 | A3SS | ENSG00000143499_SMYD2_1_+_214504292_214507651_214507542_214507651_214503510_214503621_1.0,1.0 | -0.784 | Down | 5.28E-07 | 0.000239008 |
| MAPKBP1 | A3SS | ENSG00000137802_MAPKBP1_15_+_ 42107456_ 42107997_ 42107821_ 42107997_ 42106747_ 42106937_1.0,1.0 | -0.479 | Down | 4.75E-07 | 0.000239008 |
| CARF | A3SS | ENSG00000138380_CARF_2_+_203789019_203789138_203789079_203789138_203782599_203782766_0.583,1.0 | -0.617 | Down | 8.12E-07 | 0.000324523 |
| AGTRAP | A3SS | ENSG00000177674_AGTRAP_1_+_ 11805986_ 11806280_ 11806044_ 11806280_ 11805859_ 11805894_0.0,0.0 | 0.529 | Up | 1.39E-06 | 0.000501864 |
| RBM26 | A3SS | ENSG00000139746_RBM26_13_-_ 79928573_ 79928705_ 79928573_ 79928696_ 79929354_ 79929519_1.0,1.0 | -0.374 | Down | 1.71E-06 | 0.000558221 |
| CCNL2 | A3SS | ENSG00000221978_CCNL2_1_-_ 1326145_ 1326955_ 1326145_ 1326245_ 1328169_ 1328183_1.0,1.0 | -0.422 | Down | 2.28E-06 | 0.000682766 |
| C16orf93 | A3SS | ENSG00000196118_C16orf93_16_-_ 30770974_ 30771130_ 30770974_ 30771045_ 30771604_ 30771989_0.0,0.237 | 0.881 | Up | 2.75E-06 | 0.000761887 |
| HSD17B1 | A3SS | ENSG00000108786_HSD17B1_17_+_ 40706419_ 40706600_ 40706422_ 40706600_ 40705811_ 40705905_1.0,1.0 | -0.528 | Down | 4.48E-06 | 0.001151632 |
| SLC25A10 | A3SS | ENSG00000183048_SLC25A10_17_+_ 79684723_ 79684891_ 79684786_ 79684891_ 79684428_ 79684521_0.0,0.0 | 0.227 | Up | 4.85E-06 | 0.001164853 |
| FNBP1 | A3SS | ENSG00000187239_FNBP1_9_-_132686122_132686305_132686122_132686218_132687238_132687436_1.0,1.0 | -0.447 | Down | 5.42E-06 | 0.001218324 |
| ZNF473 | A3SS | ENSG00000142528_ZNF473_19_+_ 50534148_ 50534348_ 50534270_ 50534348_ 50529149_ 50529379_1.0,1.0 | -0.44 | Down | 6.67E-06 | 0.001412024 |
| PGS1 | A3SS | ENSG00000087157_PGS1_17_+_ 76410959_ 76411108_ 76411032_ 76411108_ 76399648_ 76400170_1.0,1.0 | -0.347 | Down | 7.81E-06 | 0.001561927 |
| ZNF584 | A3SS | ENSG00000171574_ZNF584_19_+_ 58927159_ 58927307_ 58927185_ 58927307_ 58926890_ 58927013_1.0,0.771 | -0.643 | Down | 1.05E-05 | 0.001830116 |
| UBXN11 | A3SS | ENSG00000158062_UBXN11_1_-_ 26627416_ 26627544_ 26627416_ 26627515_ 26628184_ 26628213_0.0,0.0 | 0.538 | Up | 1.27E-05 | 0.002078188 |
| TTC18 | A3SS | ENSG00000156042_TTC18_10_-_ 75082720_ 75082855_ 75082720_ 75082785_ 75090934_ 75091034_1.0,0.889 | -0.382 | Down | 1.37E-05 | 0.002148384 |
| MASTL | A3SS | ENSG00000120539_MASTL_10_+_ 27462046_ 27462188_ 27462049_ 27462188_ 27458872_ 27460012_0.62,0.746 | -0.399 | Down | 1.51E-05 | 0.002177315 |
| NFKBID | A3SS | ENSG00000167604_NFKBID_19_-_ 36387814_ 36388005_ 36387814_ 36387960_ 36388552_ 36388758_0.0,0.0 | 0.512 | Up | 1.85E-05 | 0.002283351 |
| SYBU | A3SS | ENSG00000147642_SYBU_8_-_110654956_110655161_110654956_110655158_110656864_110656945_1.0,1.0 | -0.836 | Down | 1.90E-05 | 0.002283351 |
| SDHA | A3SS | ENSG00000073578_SDHA_5_+_ 254472_ 254621_ 254507_ 254621_ 240472_ 240591_1.0,1.0 | -0.293 | Down | 1.74E-05 | 0.002283351 |
| FCF1 | A3SS | ENSG00000119616_FCF1_14_+_ 75182523_ 75182802_ 75182653_ 75182802_ 75181574_ 75181646_0.0,0.0 | 0.214 | Up | 1.89E-05 | 0.002283351 |
| XRCC3 | A3SS | ENSG00000126215_XRCC3_14_-_104177802_104177998_104177802_104177904_104181760_104181821_1.0,1.0 | -0.365 | Down | 1.87E-05 | 0.002283351 |
| FKBP7 | A3SS | ENSG00000079150_FKBP7_2_-_179334378_179334512_179334378_179334509_179341788_179341940_0.927,1.0 | -0.369 | Down | 2.29E-05 | 0.002657611 |
| WDR27 | A3SS | ENSG00000184465_WDR27_6_-_170068077_170068281_170068077_170068191_170070664_170070789_1.0,1.0 | -0.55 | Down | 2.54E-05 | 0.002857305 |
| CCDC88A | A3SS | ENSG00000115355_CCDC88A_2_-_ 55555429_ 55555571_ 55555429_ 55555568_ 55559701_ 55559829_1.0,1.0 | -0.294 | Down | 4.04E-05 | 0.004280811 |
| GMIP | A3SS | ENSG00000089639_GMIP_19_-_ 19746223_ 19746530_ 19746223_ 19746378_ 19747515_ 19747605_1.0,1.0 | -0.309 | Down | 4.96E-05 | 0.005104898 |
| PRKCSH | A3SS | ENSG00000130175_PRKCSH_19_+_ 11558507_ 11558604_ 11558537_ 11558604_ 11558253_ 11558433_1.0,0.935 | -0.245 | Down | 5.83E-05 | 0.005674275 |
| ZNF512 | A3SS | ENSG00000243943_ZNF512_2_+_ 27820933_ 27821121_ 27820936_ 27821121_ 27806524_ 27806583_1.0,1.0 | -0.274 | Down | 6.45E-05 | 0.00595625 |
| PLEKHA6 | A3SS | ENSG00000143850_PLEKHA6_1_-_204230433_204230636_204230433_204230576_204234069_204234170_0.636,1.0 | -0.744 | Down | 7.34E-05 | 0.006369705 |
| QKI | A3SS | ENSG00000112531_QKI_6_+_163985698_163991177_163986977_163991177_163984451_163984751_0.786,0.797 | -0.329 | Down | 7.43E-05 | 0.006369705 |
| ATP11A | A3SS | ENSG00000068650_ATP11A_13_+_113536126_113541482_113536189_113541482_113530089_113530255_1.0,1.0 | -0.293 | Down | 8.15E-05 | 0.006823016 |
| PXK | A3SS | ENSG00000168297_PXK_3_+_ 58398627_ 58398690_ 58398630_ 58398690_ 58395816_ 58395886_1.0,1.0 | -0.266 | Down | 9.07E-05 | 0.007418349 |
| PLD3 | A3SS | ENSG00000105223_PLD3_19_+_ 40872290_ 40872417_ 40872325_ 40872417_ 40871459_ 40871492_0.347,1.0 | -0.622 | Down | 9.28E-05 | 0.007423023 |
| ZNF780A | A3SS | ENSG00000197782_ZNF780A_19_-_ 40587725_ 40587824_ 40587725_ 40587821_ 40589017_ 40589144_0.0,0.105 | 0.264 | Up | 0.00010605 | 0.008296985 |
| PTBP2 | A3SS | ENSG00000117569_PTBP2_1_+_ 97270340_ 97270495_ 97270355_ 97270495_ 97250614_ 97250810_1.0,0.783 | -0.581 | Down | 0.00011187 | 0.00854441 |
| ATP11A | A3SS | ENSG00000068650_ATP11A_13_+_113536129_113541482_113536189_113541482_113530089_113530255_1.0,1.0 | -0.266 | Down | 0.00011954 | 0.008622085 |
| MITF | A3SS | ENSG00000187098_MITF_3_+_ 70000962_ 70001037_ 70000980_ 70001037_ 69998201_ 69998319_0.0,0.0 | 0.208 | Up | 0.0001326 | 0.008837481 |
| YAF2 | A3SS | ENSG00000015153_YAF2_12_-_ 42604349_ 42604482_ 42604349_ 42604421_ 42631400_ 42631526_0.0,0.148 | 0.508 | Up | 0.00013092 | 0.008837481 |
| WDR31 | A3SS | ENSG00000148225_WDR31_9_-_116093263_116093396_116093263_116093393_116094186_116094330_1.0,1.0 | -0.369 | Down | 0.0001554 | 0.009812291 |
| BAHD1 | A3SS | ENSG00000140320_BAHD1_15_+_ 40754110_ 40754493_ 40754113_ 40754493_ 40750649_ 40752095_0.395,0.495 | 0.46 | Up | 0.00018884 | 0.011717874 |
| CBX7 | A3SS | ENSG00000100307_CBX7_22_-_ 39530405_ 39530757_ 39530405_ 39530478_ 39534640_ 39534707_0.454,0.599 | 0.474 | Up | 0.00021144 | 0.01289799 |
| PMS2P5 | A3SS | ENSG00000123965_PMS2P5_7_+_ 74312515_ 74312628_ 74312525_ 74312628_ 74312262_ 74312349_1.0,1.0 | -0.404 | Down | 0.00022006 | 0.012983429 |
| ZNF764 | A3SS | ENSG00000169951_ZNF764_16_-_ 30565084_ 30567431_ 30565084_ 30567428_ 30569053_ 30569167_0.164,0.0 | 0.386 | Up | 0.00025609 | 0.013964395 |
| POT1 | A3SS | ENSG00000128513_POT1_7_-_124568868_124569053_124568868_124569050_124569847_124569879_0.0,0.595 | 0.66 | Up | 0.00028815 | 0.015280968 |
| ZNF382 | A3SS | ENSG00000161298_ZNF382_19_+_ 37100803_ 37100955_ 37100828_ 37100955_ 37098453_ 37098524_0.0,0.521 | -0.261 | Down | 0.00033651 | 0.016590267 |
| TMEM25 | A3SS | ENSG00000149582_TMEM25_11_+_118402489_118402586_118402492_118402586_118401906_118401949_0.495,0.246 | 0.377 | Up | 0.00033398 | 0.016590267 |
| PPFIA2 | A3SS | ENSG00000139220_PPFIA2_12_-_ 81675035_ 81675229_ 81675035_ 81675211_ 81688613_ 81688814_0.622,0.717 | 0.26 | Up | 0.00038496 | 0.01872248 |
| CIC | A3SS | ENSG00000079432_CIC_19_+_ 42798086_ 42798241_ 42798089_ 42798241_ 42797743_ 42797988_0.655,0.76 | -0.235 | Down | 0.00040532 | 0.019194159 |
| PEX1 | A3SS | ENSG00000127980_PEX1_7_-_ 92130820_ 92131393_ 92130820_ 92130987_ 92132354_ 92132509_1.0,1.0 | -0.207 | Down | 0.00042177 | 0.019641809 |
| PSIP1 | A3SS | ENSG00000164985_PSIP1_9_-_ 15470633_ 15471309_ 15470633_ 15471229_ 15472629_ 15472748_0.704,0.543 | -0.359 | Down | 0.00050071 | 0.021976396 |
| DRG2 | A3SS | ENSG00000108591_DRG2_17_+_ 18002946_ 18003749_ 18003676_ 18003749_ 18002330_ 18002391_1.0,0.46 | 0.27 | Up | 0.00051546 | 0.022085037 |
| SYNGAP1 | A3SS | ENSG00000197283_SYNGAP1_6_+_ 33414351_ 33414563_ 33414357_ 33414563_ 33412220_ 33412394_1.0,1.0 | -0.294 | Down | 0.00058903 | 0.024146708 |
| CEP57L1 | A3SS | ENSG00000183137_CEP57L1_6_+_109480420_109480665_109480471_109480665_109480227_109480305_0.328,0.234 | -0.258 | Down | 0.0006314 | 0.025532567 |
| ACOT8 | A3SS | ENSG00000101473_ACOT8_20_-_ 44482561_ 44482623_ 44482561_ 44482618_ 44483797_ 44483931_0.0,0.326 | 0.618 | Up | 0.0007425 | 0.028428371 |
| ZNF566 | A3SS | ENSG00000186017_ZNF566_19_-_ 36963812_ 36963911_ 36963812_ 36963908_ 36964233_ 36964360_0.0,0.246 | 0.311 | Up | 0.00072844 | 0.028428371 |
| DESI2 | A3SS | ENSG00000121644_DESI2_1_+_244855180_244855322_244855185_244855322_244849898_244849971_1.0,1.0 | -0.289 | Down | 0.00075569 | 0.028628728 |
| MSTO1 | A3SS | ENSG00000125459_MSTO1_1_+_155581217_155581394_155581339_155581394_155581006_155581082_0.056,0.082 | 0.205 | Up | 0.00077717 | 0.028835537 |
| MAP4K2 | A3SS | ENSG00000168067_MAP4K2_11_-_ 64564575_ 64564664_ 64564575_ 64564640_ 64564746_ 64564852_1.0,1.0 | -0.27 | Down | 0.00077458 | 0.028835537 |
| PLEKHA7 | A3SS | ENSG00000166689_PLEKHA7_11_-_ 16812557_ 16812749_ 16812557_ 16812746_ 16816034_ 16816261_0.0,1.0 | 0.5 | Up | 0.00081097 | 0.029186647 |
| MAGIX | A3SS | ENSG00000017621_MAGIX_X_+_ 49022412_ 49022971_ 49022427_ 49022971_ 49021527_ 49021699_0.644,1.0 | -0.608 | Down | 0.00086938 | 0.029910832 |
| PCGF3 | A3SS | ENSG00000185619_PCGF3_4_+_ 726188_ 726287_ 726232_ 726287_ 724758_ 724899_1.0,1.0 | -0.209 | Down | 0.00087264 | 0.029910832 |
| FOXP1 | A3SS | ENSG00000114861_FOXP1_3_-_ 71026793_ 71026873_ 71026793_ 71026870_ 71026978_ 71027180_0.83,0.895 | -0.227 | Down | 0.00097283 | 0.031304838 |
| CLTCL1 | A3SS | ENSG00000070371_CLTCL1_22_-_ 19183776_ 19184167_ 19183776_ 19183926_ 19187244_ 19187352_1.0,1.0 | -0.607 | Down | 0.00102339 | 0.032308461 |
| STOML1 | A3SS | ENSG00000067221_STOML1_15_-_ 74276999_ 74277212_ 74276999_ 74277209_ 74277658_ 74277854_1.0,0.893 | -0.326 | Down | 0.00104832 | 0.032524899 |
| GPNMB | A3SS | ENSG00000136235_GPNMB_7_+_ 23306099_ 23306234_ 23306135_ 23306234_ 23300074_ 23300392_0.0,0.0 | 0.231 | Up | 0.00110842 | 0.03399085 |
| MIB2 | A3SS | ENSG00000197530_MIB2_1_+_ 1560925_ 1562134_ 1562029_ 1562134_ 1560665_ 1560808_1.0,0.627 | -0.415 | Down | 0.00111445 | 0.03399085 |
| SPPL2B | A3SS | ENSG00000005206_SPPL2B_19_+_ 2339822_ 2339965_ 2339825_ 2339965_ 2339067_ 2339207_0.797,0.688 | 0.202 | Up | 0.0011624 | 0.035155148 |
| GTF2IRD1 | A3SS | ENSG00000006704_GTF2IRD1_7_+_ 73969722_ 73969824_ 73969767_ 73969824_ 73969503_ 73969553_1.0,0.602 | -0.443 | Down | 0.0012057 | 0.035807557 |
| PHF21A | A3SS | ENSG00000135365_PHF21A_11_-_ 46098304_ 46098391_ 46098304_ 46098370_ 46100684_ 46100717_0.465,0.063 | -0.252 | Down | 0.00146089 | 0.040444252 |
| ARHGAP33 | A3SS | ENSG00000004777_ARHGAP33_19_+_ 36277314_ 36277974_ 36277797_ 36277974_ 36276310_ 36276385_1.0,1.0 | -0.323 | Down | 0.0015333 | 0.041420307 |
| RP11-347C12.2 | A3SS | ENSG00000183604_RP11-347C12.2_16_-_ 30288584_ 30288749_ 30288584_ 30288707_ 30288917_ 30289114_1.0,1.0 | -0.283 | Down | 0.00163348 | 0.041613387 |
| SEPT5 | A3SS | ENSG00000184702_SEPT5_22_+_ 19709344_ 19709480_ 19709355_ 19709480_ 19709162_ 19709259_1.0,1.0 | -0.222 | Down | 0.00160079 | 0.041613387 |
| MIB2 | A3SS | ENSG00000197530_MIB2_1_+_ 1558768_ 1559079_ 1558810_ 1559079_ 1551887_ 1551994_0.0,0.658 | 0.474 | Up | 0.00160602 | 0.041613387 |
| IRF7 | A3SS | ENSG00000185507_IRF7_11_-_ 614475_ 614534_ 614475_ 614531_ 614796_ 615007_1.0,1.0 | -0.23 | Down | 0.00178502 | 0.044001848 |
| METTL17 | A3SS | ENSG00000165792_METTL17_14_+_ 21460250_ 21460364_ 21460282_ 21460364_ 21458622_ 21458757_0.404,0.494 | -0.245 | Down | 0.00194988 | 0.047368335 |
| ZNF19 | A3SS | ENSG00000157429_ZNF19_16_-_ 71512781_ 71513003_ 71512781_ 71512908_ 71515984_ 71516046_1.0,0.0 | 0.5 | Up | 0.00200809 | 0.048180824 |
| PLXND1 | A3SS | ENSG00000004399_PLXND1_3_-_129304794_129304924_129304794_129304891_129305014_129305115_0.708,0.669 | 0.285 | Up | 0.00207204 | 0.048740417 |
| PTPN4 | A5SS | ENSG00000088179_PTPN4_2_+_120672754_120674266_120672754_120672818_120689999_120690125_1.0,1.0 | -0.925 | Down | 1.89E-15 | 4.62E-12 |
| ELMOD3 | A5SS | ENSG00000115459_ELMOD3_2_+_ 85582677_ 85582907_ 85582677_ 85582721_ 85584089_ 85584375_0.176,0.0 | 0.912 | Up | 4.30E-14 | 5.26E-11 |
| ELMOD3 | A5SS | ENSG00000115459_ELMOD3_2_+_ 85582677_ 85582839_ 85582677_ 85582721_ 85584089_ 85584375_0.213,0.0 | 0.893 | Up | 3.11E-13 | 2.54E-10 |
| ELMOD3 | A5SS | ENSG00000115459_ELMOD3_2_+_ 85582677_ 85583019_ 85582677_ 85582721_ 85584089_ 85584375_0.137,0.096 | 0.883 | Up | 1.56E-10 | 9.55E-08 |
| UBE2J2 | A5SS | ENSG00000160087_UBE2J2_1_-_ 1203112_ 1203372_ 1203241_ 1203372_ 1201477_ 1201670_1.0,1.0 | -0.814 | Down | 8.07E-09 | 3.95E-06 |
| MGAT4B | A5SS | ENSG00000161013_MGAT4B_5_-_179225503_179225591_179225512_179225591_179225164_179225277_1.0,1.0 | -0.84 | Down | 1.48E-07 | 6.02E-05 |
| MRRF | A5SS | ENSG00000148187_MRRF_9_+_125047447_125048225_125047447_125047566_125048317_125048445_1.0,1.0 | -0.708 | Down | 2.58E-07 | 7.90E-05 |
| HDLBP | A5SS | ENSG00000115677_HDLBP_2_-_242208372_242208710_242208620_242208710_242207891_242207956_0.152,0.152 | 0.848 | Up | 2.41E-07 | 7.90E-05 |
| CCDC84 | A5SS | ENSG00000186166_CCDC84_11_+_118881930_118882021_118881930_118881993_118882648_118882713_0.0,0.0 | 0.813 | Up | 3.85E-07 | 0.000104831 |
| AC007405.6 | A5SS | ENSG00000239467_AC007405.6_2_+_171627622_171627937_171627622_171627697_171633886_171633935_1.0,1.0 | -0.625 | Down | 4.86E-07 | 0.000119082 |
| P4HTM | A5SS | ENSG00000178467_P4HTM_3_+_ 49039932_ 49043620_ 49039932_ 49040029_ 49044119_ 49044548_1.0,1.0 | -0.607 | Down | 7.13E-07 | 0.000158677 |
| PNISR | A5SS | ENSG00000132424_PNISR_6_-_ 99851704_ 99852578_ 99852478_ 99852578_ 99850415_ 99850586_1.0,1.0 | -0.558 | Down | 1.03E-06 | 0.000210146 |
| ITPR1 | A5SS | ENSG00000150995_ITPR1_3_+_ 4716751_ 4716932_ 4716751_ 4716905_ 4718297_ 4718485_0.0,0.0 | 0.636 | Up | 1.22E-06 | 0.00021399 |
| ACAA2 | A5SS | ENSG00000167315_ACAA2_18_-_ 47340051_ 47340323_ 47340186_ 47340323_ 47329056_ 47329223_0.753,0.487 | 0.38 | Up | 1.22E-06 | 0.00021399 |
| PTBP3 | A5SS | ENSG00000119314_PTBP3_9_-_115060111_115060196_115060120_115060196_115030328_115030475_1.0,0.956 | -0.267 | Down | 1.38E-06 | 0.00022581 |
| CDK20 | A5SS | ENSG00000156345_CDK20_9_-_ 90585482_ 90585812_ 90585690_ 90585812_ 90584710_ 90584834_1.0,1.0 | -0.477 | Down | 1.77E-06 | 0.000270055 |
| CD46 | A5SS | ENSG00000117335_CD46_1_+_207940357_207943707_207940357_207940540_207956636_207956675_1.0,1.0 | -0.419 | Down | 1.99E-06 | 0.000286107 |
| GMIP | A5SS | ENSG00000089639_GMIP_19_-_ 19753343_ 19753428_ 19753345_ 19753428_ 19752784_ 19752860_0.568,0.862 | 0.285 | Up | 3.88E-06 | 0.000500181 |
| ZNF276 | A5SS | ENSG00000158805_ZNF276_16_+_ 89793686_ 89793765_ 89793686_ 89793733_ 89795642_ 89795726_0.83,1.0 | -0.404 | Down | 3.77E-06 | 0.000500181 |
| NOL8 | A5SS | ENSG00000198000_NOL8_9_-_ 95087187_ 95087632_ 95087599_ 95087632_ 95086304_ 95086491_0.084,0.153 | 0.488 | Up | 1.54E-05 | 0.001710276 |
| CLPTM1L | A5SS | ENSG00000049656_CLPTM1L_5_-_ 1331913_ 1331998_ 1331917_ 1331998_ 1325865_ 1325931_1.0,1.0 | -0.35 | Down | 2.02E-05 | 0.002065092 |
| ZSCAN25 | A5SS | ENSG00000197037_ZSCAN25_7_+_ 99217183_ 99217620_ 99217183_ 99217616_ 99218995_ 99219197_0.163,0.0 | 0.269 | Up | 4.24E-05 | 0.003994425 |
| CLN6 | A5SS | ENSG00000128973_CLN6_15_-_ 68503893_ 68504201_ 68503986_ 68504201_ 68503600_ 68503656_1.0,1.0 | -0.369 | Down | 5.25E-05 | 0.004758795 |
| RMND1 | A5SS | ENSG00000155906_RMND1_6_-_151757554_151757689_151757580_151757689_151754289_151754365_0.0,0.0 | 0.201 | Up | 5.53E-05 | 0.004831338 |
| CCNL2 | A5SS | ENSG00000221978_CCNL2_1_-_ 1328058_ 1328183_ 1328169_ 1328183_ 1326145_ 1326245_1.0,1.0 | -0.266 | Down | 6.16E-05 | 0.00486266 |
| WDR90 | A5SS | ENSG00000161996_WDR90_16_+_ 703745_ 705147_ 703745_ 703803_ 705306_ 705468_1.0,1.0 | -0.64 | Down | 5.96E-05 | 0.00486266 |
| MYO9A | A5SS | ENSG00000066933_MYO9A_15_-_ 72244042_ 72244237_ 72244117_ 72244237_ 72231192_ 72231268_0.722,1.0 | -0.53 | Down | 6.76E-05 | 0.004864673 |
| HDLBP | A5SS | ENSG00000115677_HDLBP_2_-_242208368_242208710_242208620_242208710_242207891_242207956_0.471,0.516 | 0.506 | Up | 6.59E-05 | 0.004864673 |
| MSTO1 | A5SS | ENSG00000125459_MSTO1_1_+_155583447_155583557_155583447_155583524_155583849_155584726_0.821,0.649 | 0.233 | Up | 8.17E-05 | 0.005407656 |
| ZMYND8 | A5SS | ENSG00000101040_ZMYND8_20_-_ 45867501_ 45867882_ 45867639_ 45867882_ 45865069_ 45865260_0.091,0.0 | 0.215 | Up | 8.59E-05 | 0.005531606 |
| MYB | A5SS | ENSG00000118513_MYB_6_+_135515493_135515598_135515493_135515589_135516885_135517140_1.0,1.0 | -0.254 | Down | 9.95E-05 | 0.006247279 |
| STK16 | A5SS | ENSG00000115661_STK16_2_+_220110617_220111598_220110617_220110807_220112136_220112257_1.0,1.0 | -0.268 | Down | 0.00010732 | 0.006392125 |
| SLC25A19 | A5SS | ENSG00000125454_SLC25A19_17_-_ 73284468_ 73284672_ 73284578_ 73284672_ 73282713_ 73282883_1.0,1.0 | -0.244 | Down | 0.00011781 | 0.006707005 |
| GALE | A5SS | ENSG00000117308_GALE_1_-_ 24122998_ 24123272_ 24123186_ 24123272_ 24122640_ 24122755_1.0,1.0 | -0.241 | Down | 0.00012297 | 0.006841878 |
| SERF2 | A5SS | ENSG00000140264_SERF2_15_+_ 44084565_ 44084809_ 44084565_ 44084776_ 44085172_ 44085281_0.492,0.336 | 0.46 | Up | 0.00012623 | 0.006867108 |
| RAD51AP1 | A5SS | ENSG00000111247_RAD51AP1_12_+_ 4652928_ 4653077_ 4652928_ 4653070_ 4655474_ 4655584_0.488,0.192 | -0.299 | Down | 0.00013401 | 0.007131874 |
| QARS | A5SS | ENSG00000172053_QARS_3_-_ 49141789_ 49141904_ 49141805_ 49141904_ 49141295_ 49141405_1.0,1.0 | -0.259 | Down | 0.00015009 | 0.007817344 |
| CLK3 | A5SS | ENSG00000179335_CLK3_15_+_ 74912349_ 74914557_ 74912349_ 74912566_ 74914834_ 74914901_1.0,1.0 | -0.426 | Down | 0.00018356 | 0.008987034 |
| SDR39U1 | A5SS | ENSG00000100445_SDR39U1_14_-_ 24911303_ 24911466_ 24911383_ 24911466_ 24909988_ 24910132_1.0,0.559 | -0.539 | Down | 0.00023481 | 0.011054303 |
| MSH5 | A5SS | ENSG00000204410_MSH5_6_+_ 31707724_ 31707997_ 31707724_ 31707839_ 31708939_ 31709063_0.0,0.584 | 0.534 | Up | 0.00025342 | 0.011705236 |
| NOL8 | A5SS | ENSG00000198000_NOL8_9_-_ 95087587_ 95087632_ 95087599_ 95087632_ 95086304_ 95086491_0.077,0.664 | 0.534 | Up | 0.0003114 | 0.013673823 |
| PLCD1 | A5SS | ENSG00000187091_PLCD1_3_-_ 38051394_ 38051766_ 38051621_ 38051766_ 38051143_ 38051302_1.0,1.0 | -0.399 | Down | 0.0003128 | 0.013673823 |
| BRF1 | A5SS | ENSG00000185024_BRF1_14_-_105766782_105781926_105781658_105781926_105752632_105752713_1.0,1.0 | -0.45 | Down | 0.00044876 | 0.017718689 |
| PACRGL | A5SS | ENSG00000163138_PACRGL_4_+_ 20702081_ 20702410_ 20702081_ 20702370_ 20706088_ 20706156_0.631,0.591 | 0.295 | Up | 0.00044772 | 0.017718689 |
| RP11-296I10.6 | A5SS | ENSG00000261556_RP11-296I10.6_16_-_ 70265225_ 70265426_ 70265339_ 70265426_ 70264896_ 70265061_1.0,1.0 | -0.427 | Down | 0.00049206 | 0.018821468 |
| SNRNP70 | A5SS | ENSG00000104852_SNRNP70_19_+_ 49605370_ 49606844_ 49605370_ 49605430_ 49607890_ 49607992_1.0,1.0 | -0.447 | Down | 0.00050431 | 0.018993156 |
| WDR90 | A5SS | ENSG00000161996_WDR90_16_+_ 712672_ 713064_ 712672_ 712844_ 715678_ 715801_0.052,0.279 | 0.603 | Up | 0.0005253 | 0.019020499 |
| RTEL1 | A5SS | ENSG00000258366_RTEL1_20_+_ 62326680_ 62327003_ 62326680_ 62326833_ 62327130_ 62327606_1.0,0.474 | -0.463 | Down | 0.00054389 | 0.019020499 |
| HDLBP | A5SS | ENSG00000115677_HDLBP_2_-_242208615_242208710_242208620_242208710_242207891_242207956_0.659,0.591 | 0.375 | Up | 0.00065481 | 0.022577006 |
| STXBP2 | A5SS | ENSG00000076944_STXBP2_19_+_ 7712047_ 7712397_ 7712047_ 7712133_ 7712610_ 7712759_1.0,1.0 | -0.224 | Down | 0.00072583 | 0.024011284 |
| STOX1 | A5SS | ENSG00000165730_STOX1_10_+_ 70644015_ 70646374_ 70644015_ 70644215_ 70652344_ 70652816_0.261,1.0 | 0.369 | Up | 0.00077777 | 0.025050544 |
| TMSB15B | A5SS | ENSG00000158427_TMSB15B_X_+_103217241_103218867_103217241_103217296_103219078_103219195_1.0,0.58 | -0.576 | Down | 0.00080044 | 0.025121517 |
| RAB15 | A5SS | ENSG00000139998_RAB15_14_-_ 65417660_ 65417869_ 65417791_ 65417869_ 65417042_ 65417132_0.045,0.038 | 0.207 | Up | 0.00081875 | 0.025186223 |
| SSBP4 | A5SS | ENSG00000130511_SSBP4_19_+_ 18544519_ 18544742_ 18544519_ 18544627_ 18545026_ 18545372_1.0,0.732 | -0.503 | Down | 0.00084034 | 0.025396805 |
| MUTYH | A5SS | ENSG00000132781_MUTYH_1_-_ 45803857_ 45804328_ 45804178_ 45804328_ 45800062_ 45800183_0.232,1.0 | -0.508 | Down | 0.00088274 | 0.025838286 |
| SLC39A11 | A5SS | ENSG00000133195_SLC39A11_17_-_ 70943869_ 70944014_ 70943890_ 70944014_ 70845772_ 70845943_0.367,0.118 | 0.313 | Up | 0.00091745 | 0.026422656 |
| RBMS2 | A5SS | ENSG00000076067_RBMS2_12_+_ 56981337_ 56981448_ 56981337_ 56981443_ 56982077_ 56982158_0.0,0.326 | 0.595 | Up | 0.00105322 | 0.029157551 |
| RPS6KL1 | A5SS | ENSG00000198208_RPS6KL1_14_-_ 75375803_ 75376851_ 75376245_ 75376851_ 75375552_ 75375635_0.107,1.0 | 0.447 | Up | 0.001235 | 0.033222834 |
| ELMOD3 | A5SS | ENSG00000115459_ELMOD3_2_+_ 85598208_ 85598685_ 85598208_ 85598332_ 85604466_ 85604597_0.22,0.0 | 0.589 | Up | 0.00125334 | 0.033349614 |
| FAM86B1 | A5SS | ENSG00000186523_FAM86B1_8_-_ 12051385_ 12051591_ 12051483_ 12051591_ 12049287_ 12049350_0.54,0.227 | 0.617 | Up | 0.00142272 | 0.037051247 |
| NECAP2 | A5SS | ENSG00000157191_NECAP2_1_+_ 16775587_ 16778510_ 16775587_ 16775696_ 16782312_ 16782388_1.0,0.18 | 0.41 | Up | 0.00147822 | 0.037504445 |
| KAT6B | A5SS | ENSG00000156650_KAT6B_10_+_ 76741544_ 76744999_ 76741544_ 76741686_ 76748776_ 76748870_1.0,1.0 | -0.384 | Down | 0.00155256 | 0.038006669 |
| KLK4 | A5SS | ENSG00000167749_KLK4_19_-_ 51411614_ 51412085_ 51411834_ 51412085_ 51410189_ 51410342_0.657,0.481 | -0.207 | Down | 0.00159494 | 0.038246239 |
| U2SURP | A5SS | ENSG00000163714_U2SURP_3_+_142740191_142740227_142740191_142740224_142740314_142740397_0.704,0.62 | -0.255 | Down | 0.00158123 | 0.038246239 |
| CTNND1 | A5SS | ENSG00000198561_CTNND1_11_+_ 57529268_ 57529591_ 57529268_ 57529540_ 57561481_ 57561553_1.0,0.921 | -0.241 | Down | 0.00160922 | 0.038246239 |
| PARD3 | A5SS | ENSG00000148498_PARD3_10_-_ 34626202_ 34626354_ 34626205_ 34626354_ 34625126_ 34625171_1.0,0.329 | -0.5 | Down | 0.00169536 | 0.039153271 |
| RNF146 | A5SS | ENSG00000118518_RNF146_6_+_127588027_127588240_127588027_127588070_127601375_127601485_0.184,0.231 | -0.208 | Down | 0.00175881 | 0.039687137 |
| SGK494 | A5SS | ENSG00000167524_SGK494_17_-_ 26938410_ 26938674_ 26938584_ 26938674_ 26938160_ 26938271_1.0,1.0 | -0.314 | Down | 0.00178123 | 0.039687137 |
| USP32 | A5SS | ENSG00000170832_USP32_17_-_ 58296988_ 58297148_ 58297030_ 58297148_ 58291980_ 58292135_0.237,0.363 | 0.221 | Up | 0.00185851 | 0.04026226 |
| SDR39U1 | A5SS | ENSG00000100445_SDR39U1_14_-_ 24911314_ 24911466_ 24911383_ 24911466_ 24909988_ 24910132_1.0,0.401 | -0.428 | Down | 0.00205143 | 0.04366869 |
| HPS1 | A5SS | ENSG00000107521_HPS1_10_-_100193696_100193848_100193739_100193848_100190887_100191048_0.0,0.179 | 0.279 | Up | 0.00214902 | 0.045351676 |
| SCAPER | A5SS | ENSG00000140386_SCAPER_15_-_ 77087581_ 77087781_ 77087620_ 77087781_ 77067195_ 77067458_0.281,0.143 | -0.212 | Down | 0.00238583 | 0.048510638 |
| ZNF384 | A5SS | ENSG00000126746_ZNF384_12_-_ 6798263_ 6798676_ 6798533_ 6798676_ 6797332_ 6797392_1.0,1.0 | -0.305 | Down | 0.00241761 | 0.048510638 |
| CAPN10 | A5SS | ENSG00000142330_CAPN10_2_+_241530231_241530428_241530231_241530417_241531349_241531567_0.65,0.764 | 0.293 | Up | 0.00247911 | 0.048942331 |
| MBD5 | A5SS | ENSG00000204406_MBD5_2_+_149240678_149241704_149240678_149241005_149243310_149243519_1.0,1.0 | -0.325 | Down | 0.00246111 | 0.048942331 |
| NUP54 | RI | ENSG00000138750_NUP54_4_-_ 77038816_ 77039347_ 77038816_ 77038895_ 77039227_ 77039347_1.0,1.0 | -0.955 | Down | 2.94E-12 | 8.94E-09 |
| ADC | RI | ENSG00000142920_ADC_1_+_ 33583502_ 33586131_ 33583502_ 33583717_ 33585644_ 33586131_1.0,1.0 | -1 | Down | 2.72E-10 | 4.15E-07 |
| RHOT2 | RI | ENSG00000140983_RHOT2_16_+_ 718655_ 720175_ 718655_ 718699_ 720122_ 720175_1.0,1.0 | -0.743 | Down | 6.94E-10 | 5.28E-07 |
| MTO1 | RI | ENSG00000135297_MTO1_6_+_ 74189658_ 74190090_ 74189658_ 74189849_ 74190015_ 74190090_0.0,0.0 | 0.789 | Up | 5.98E-10 | 5.28E-07 |
| B4GALNT1 | RI | ENSG00000135454_B4GALNT1_12_-_ 58021400_ 58022045_ 58021400_ 58021674_ 58021904_ 58022045_0.0,0.0 | 1 | Up | 2.70E-09 | 1.65E-06 |
| ZNF598 | RI | ENSG00000167962_ZNF598_16_-_ 2052521_ 2053729_ 2052521_ 2052733_ 2053616_ 2053729_1.0,1.0 | -0.601 | Down | 9.90E-08 | 4.31E-05 |
| TMEM147 | RI | ENSG00000105677_TMEM147_19_+_ 36037573_ 36038142_ 36037573_ 36037710_ 36038020_ 36038142_0.623,0.513 | 0.432 | Up | 2.01E-07 | 7.65E-05 |
| BEST1 | RI | ENSG00000167995_BEST1_11_+_ 61725617_ 61727050_ 61725617_ 61725770_ 61726969_ 61727050_1.0,1.0 | -0.785 | Down | 2.90E-07 | 9.82E-05 |
| EME2 | RI | ENSG00000197774_EME2_16_+_ 1825041_ 1825409_ 1825041_ 1825133_ 1825315_ 1825409_1.0,1.0 | -0.656 | Down | 4.07E-07 | 0.000123849 |
| ABCD4 | RI | ENSG00000119688_ABCD4_14_-_ 74759450_ 74759951_ 74759450_ 74759572_ 74759856_ 74759951_0.273,0.18 | -0.217 | Down | 2.51E-06 | 0.000694062 |
| HMBS | RI | ENSG00000256269_HMBS_11_+_118959344_118959841_118959344_118959558_118959791_118959841_1.0,1.0 | -0.54 | Down | 2.88E-06 | 0.000729566 |
| EXOSC8 | RI | ENSG00000120699_EXOSC8_13_+_ 37577070_ 37578698_ 37577070_ 37577144_ 37578613_ 37578698_1.0,1.0 | -0.693 | Down | 3.17E-06 | 0.000743572 |
| NSUN5P1 | RI | ENSG00000223705_NSUN5P1_7_+_ 75042066_ 75044301_ 75042066_ 75042210_ 75044162_ 75044301_1.0,0.0 | 0.5 | Up | 3.93E-06 | 0.000854722 |
| CLK1 | RI | ENSG00000013441_CLK1_2_-_201724402_201726189_201724402_201724469_201725960_201726189_1.0,0.839 | -0.566 | Down | 5.90E-06 | 0.001197648 |
| ZNF276 | RI | ENSG00000158805_ZNF276_16_+_ 89789544_ 89790117_ 89789544_ 89789591_ 89789667_ 89790117_0.0,0.047 | 0.225 | Up | 6.93E-06 | 0.00131975 |
| CASKIN2 | RI | ENSG00000177303_CASKIN2_17_-_ 73499469_ 73499841_ 73499469_ 73499608_ 73499739_ 73499841_0.114,0.0 | 0.44 | Up | 8.47E-06 | 0.001499108 |
| RSRC2 | RI | ENSG00000111011_RSRC2_12_-_123003385_123005975_123003385_123003598_123005931_123005975_1.0,1.0 | -0.871 | Down | 8.86E-06 | 0.001499108 |
| OTUD5 | RI | ENSG00000068308_OTUD5_X_-_ 48791736_ 48792140_ 48791736_ 48791885_ 48791968_ 48792140_1.0,1.0 | -0.464 | Down | 2.24E-05 | 0.002963835 |
| RBM3 | RI | ENSG00000102317_RBM3_X_+_ 48433948_ 48434471_ 48433948_ 48434055_ 48434202_ 48434471_1.0,1.0 | -0.406 | Down | 2.38E-05 | 0.003013639 |
| DDX26B | RI | ENSG00000165359_DDX26B_X_+_134703261_134706958_134703261_134703356_134706739_134706958_0.019,1.0 | 0.491 | Up | 2.72E-05 | 0.003310828 |
| GPT | RI | ENSG00000167701_GPT_8_+_145730153_145730514_145730153_145730262_145730380_145730514_0.764,0.289 | 0.474 | Up | 2.88E-05 | 0.003367982 |
| MAP4K2 | RI | ENSG00000168067_MAP4K2_11_-_ 64564746_ 64565006_ 64564746_ 64564852_ 64564972_ 64565006_0.041,0.137 | 0.22 | Up | 3.49E-05 | 0.003535579 |
| PGAP1 | RI | ENSG00000197121_PGAP1_2_-_197711726_197712761_197711726_197711924_197712670_197712761_0.386,0.136 | -0.261 | Down | 3.56E-05 | 0.003535579 |
| ROBO3 | RI | ENSG00000154134_ROBO3_11_+_124747414_124748027_124747414_124747648_124747832_124748027_1.0,1.0 | -0.586 | Down | 3.45E-05 | 0.003535579 |
| NARFL | RI | ENSG00000103245_NARFL_16_-_ 780842_ 782900_ 780842_ 781000_ 782300_ 782900_1.0,1.0 | -0.553 | Down | 4.16E-05 | 0.003956292 |
| CUTA | RI | ENSG00000112514_CUTA_6_-_ 33384873_ 33385087_ 33384873_ 33384919_ 33385023_ 33385087_1.0,1.0 | -0.338 | Down | 4.69E-05 | 0.004325253 |
| WASH4P | RI | ENSG00000234769_WASH4P_16_-_ 66915_ 67427_ 66915_ 67051_ 67290_ 67427_0.424,1.0 | -0.712 | Down | 5.83E-05 | 0.004711769 |
| AP1G2 | RI | ENSG00000213983_AP1G2_14_-_ 24035024_ 24035369_ 24035024_ 24035101_ 24035272_ 24035369_0.06,0.3 | 0.379 | Up | 6.95E-05 | 0.005292631 |
| SLC10A3 | RI | ENSG00000126903_SLC10A3_X_-_153718645_153719002_153718645_153718697_153718932_153719002_1.0,1.0 | -0.539 | Down | 7.24E-05 | 0.005374709 |
| NDUFV1 | RI | ENSG00000167792_NDUFV1_11_+_ 67375870_ 67376193_ 67375870_ 67375949_ 67376030_ 67376193_1.0,1.0 | -0.234 | Down | 7.91E-05 | 0.005658202 |
| HCG18 | RI | ENSG00000231074_HCG18_6_-_ 30258782_ 30262741_ 30258782_ 30260376_ 30262247_ 30262741_1.0,1.0 | -0.484 | Down | 8.39E-05 | 0.00580602 |
| TMEM256-PLSCR3 | RI | ENSG00000187838_TMEM256-PLSCR3_17_-_ 7296919_ 7297586_ 7296919_ 7297155_ 7297422_ 7297586_0.0,0.0 | 0.593 | Up | 0.00011018 | 0.007455524 |
| SYTL1 | RI | ENSG00000142765_SYTL1_1_+_ 27675888_ 27676256_ 27675888_ 27675989_ 27676142_ 27676256_0.388,0.323 | 0.557 | Up | 0.00011442 | 0.007472626 |
| QKI | RI | ENSG00000112531_QKI_6_+_163984451_163991177_163984451_163984751_163986977_163991177_0.746,0.738 | -0.337 | Down | 0.00016114 | 0.009941709 |
| MSTO1 | RI | ENSG00000125459_MSTO1_1_+_155581006_155581394_155581006_155581146_155581339_155581394_1.0,1.0 | -0.222 | Down | 0.00017381 | 0.010177852 |
| SNX16 | RI | ENSG00000104497_SNX16_8_-_ 82751846_ 82752317_ 82751846_ 82751986_ 82752073_ 82752317_1.0,1.0 | -0.209 | Down | 0.00018617 | 0.010498115 |
| NOL3 | RI | ENSG00000140939_NOL3_16_+_ 67208064_ 67208847_ 67208064_ 67208367_ 67208523_ 67208847_0.0,0.0 | 0.268 | Up | 0.00026998 | 0.01417397 |
| LYPD3 | RI | ENSG00000124466_LYPD3_19_-_ 43967277_ 43967921_ 43967277_ 43967439_ 43967750_ 43967921_1.0,1.0 | -0.436 | Down | 0.00044091 | 0.020342193 |
| B4GALNT1 | RI | ENSG00000135454_B4GALNT1_12_-_ 58021400_ 58022045_ 58021400_ 58021641_ 58021904_ 58022045_0.0,0.0 | 0.244 | Up | 0.00049383 | 0.021792868 |
| MITD1 | RI | ENSG00000158411_MITD1_2_-_ 99785725_ 99786073_ 99785725_ 99785933_ 99786012_ 99786073_1.0,0.641 | -0.579 | Down | 0.00054074 | 0.023190847 |
| GGA3 | RI | ENSG00000125447_GGA3_17_-_ 73236422_ 73237138_ 73236422_ 73236493_ 73236892_ 73237138_0.205,0.341 | -0.249 | Down | 0.00068183 | 0.025698707 |
| GMPPA | RI | ENSG00000144591_GMPPA_2_+_220370179_220370483_220370179_220370277_220370416_220370483_1.0,1.0 | -0.207 | Down | 0.00074717 | 0.025698707 |
| ZFC3H1 | RI | ENSG00000133858_ZFC3H1_12_-_ 72050122_ 72051081_ 72050122_ 72050343_ 72050664_ 72051081_1.0,1.0 | -0.353 | Down | 0.00075113 | 0.025698707 |
| SCARB1 | RI | ENSG00000073060_SCARB1_12_-_125267228_125271049_125267228_125267357_125270986_125271049_1.0,1.0 | -0.342 | Down | 0.00067127 | 0.025698707 |
| COMTD1 | RI | ENSG00000165644_COMTD1_10_-_ 76994695_ 76994936_ 76994695_ 76994750_ 76994817_ 76994936_1.0,0.643 | -0.677 | Down | 0.00071795 | 0.025698707 |
| DRG2 | RI | ENSG00000108591_DRG2_17_+_ 18002330_ 18003749_ 18002330_ 18002391_ 18003676_ 18003749_1.0,0.207 | 0.396 | Up | 0.00071099 | 0.025698707 |
| SBNO2 | RI | ENSG00000064932_SBNO2_19_-_ 1109133_ 1109597_ 1109133_ 1109210_ 1109504_ 1109597_1.0,1.0 | -0.286 | Down | 0.0007396 | 0.025698707 |
| PRPF39 | RI | ENSG00000185246_PRPF39_14_+_ 45565626_ 45565961_ 45565626_ 45565695_ 45565798_ 45565961_1.0,1.0 | -0.283 | Down | 0.00069634 | 0.025698707 |
| CDK5RAP3 | RI | ENSG00000108465_CDK5RAP3_17_+_ 46048487_ 46048773_ 46048487_ 46048518_ 46048727_ 46048773_0.062,0.166 | 0.334 | Up | 0.00079578 | 0.026923852 |
| SNHG14 | RI | ENSG00000224078_SNHG14_15_+_ 25349005_ 25351441_ 25349005_ 25349117_ 25351310_ 25351441_1.0,1.0 | -0.56 | Down | 0.00127796 | 0.038150771 |
| C19orf24 | RI | ENSG00000228300_C19orf24_19_+_ 1276091_ 1277298_ 1276091_ 1276672_ 1277181_ 1277298_1.0,1.0 | -0.33 | Down | 0.00147825 | 0.041599891 |
| USE1 | RI | ENSG00000053501_USE1_19_+_ 17326610_ 17326879_ 17326610_ 17326660_ 17326800_ 17326879_0.599,0.199 | -0.348 | Down | 0.00159587 | 0.043778679 |
| GALT | RI | ENSG00000213930_GALT_9_+_ 34647085_ 34647958_ 34647085_ 34647255_ 34647828_ 34647958_1.0,0.854 | -0.227 | Down | 0.00167546 | 0.045551509 |
| FAM133B | RI | ENSG00000234545_FAM133B_7_-_ 92206968_ 92207496_ 92206968_ 92206990_ 92207463_ 92207496_0.312,0.476 | 0.606 | Up | 0.00189848 | 0.0489905 |
| C11orf65 | MXE | ENSG00000166323_C11orf65_11_-_108277822_108277876_108302472_108302565_108277489_108277690_108332205 | -1 | Down | 3.95E-10 | 6.88E-07 |
| AC093838.4 | MXE | ENSG00000152117_AC093838.4_2_+_132254782_132254866_132256439_132256526_132250648_132250713_132257776 | 0.835 | Up | 4.84E-10 | 6.88E-07 |
| TBCD | MXE | ENSG00000141556_TBCD_17_+_ 80851422_ 80851508_ 80863811_ 80863929_ 80842020_ 80842078_ 80869633 | -0.93 | Down | 1.76E-10 | 6.88E-07 |
| SNX10 | MXE | ENSG00000086300_SNX10_7_+_ 26393676_ 26393804_ 26396626_ 26396747_ 26386039_ 26386086_ 26400594 | 0.873 | Up | 7.26E-10 | 7.75E-07 |
| HNF4G | MXE | ENSG00000164749_HNF4G_8_+_ 76456045_ 76456214_ 76459821_ 76459916_ 76402323_ 76402443_ 76463622 | -0.872 | Down | 2.72E-09 | 2.32E-06 |
| IKBKB | MXE | ENSG00000104365_IKBKB_8_+_ 42129600_ 42129723_ 42146151_ 42146246_ 42128835_ 42128987_ 42147673 | -0.799 | Down | 8.76E-09 | 6.24E-06 |
| PAQR3 | MXE | ENSG00000163291_PAQR3_4_-_ 79843294_ 79843575_ 79843982_ 79844137_ 79841687_ 79841835_ 79845010 | -0.577 | Down | 1.11E-08 | 6.79E-06 |
| RNF121 | MXE | ENSG00000137522_RNF121_11_+_ 71673197_ 71673335_ 71689131_ 71689281_ 71671795_ 71671937_ 71693806 | 0.855 | Up | 1.37E-08 | 7.30E-06 |
| EGF | MXE | ENSG00000138798_EGF_4_+_110920834_110921002_110925660_110925778_110915888_110916036_110932357 | -0.563 | Down | 8.86E-08 | 4.20E-05 |
| TMEM87A | MXE | ENSG00000103978_TMEM87A_15_-_ 42523389_ 42523458_ 42524041_ 42524113_ 42520909_ 42521018_ 42525410 | 0.218 | Up | 9.88E-08 | 4.22E-05 |
| SFMBT1 | MXE | ENSG00000163935_SFMBT1_3_-_ 52988332_ 52988427_ 53003116_ 53003274_ 52977368_ 52977609_ 53077151 | 0.35 | Up | 2.15E-07 | 8.34E-05 |
| TBC1D1 | MXE | ENSG00000065882_TBC1D1_4_+_ 38053519_ 38053681_ 38054726_ 38054846_ 38051238_ 38051519_ 38055819 | -0.641 | Down | 3.00E-07 | 0.000106587 |
| FAM86C1 | MXE | ENSG00000158483_FAM86C1_11_+_ 71502784_ 71502865_ 71504425_ 71504527_ 71500828_ 71500891_ 71507062 | 0.799 | Up | 3.57E-07 | 0.000108713 |
| CDKL3 | MXE | ENSG00000006837_CDKL3_5_-_133685939_133686118_133695587_133695782_133657481_133657594_133706688 | 0.538 | Up | 3.46E-07 | 0.000108713 |
| CD99L2 | MXE | ENSG00000102181_CD99L2_X_-_149984751_149984928_149996778_149998077_149984479_149984551_149999703 | 0.848 | Up | 1.00E-06 | 0.000285628 |
| KLC4 | MXE | ENSG00000137171_KLC4_6_+_ 43039304_ 43039357_ 43039589_ 43039660_ 43039012_ 43039112_ 43039884 | -0.622 | Down | 1.30E-06 | 0.000339195 |
| SS18 | MXE | ENSG00000141380_SS18_18_-_ 23660268_ 23660387_ 23664015_ 23664139_ 23658039_ 23658124_ 23667464 | -0.534 | Down | 1.50E-06 | 0.000355586 |
| PICK1 | MXE | ENSG00000100151_PICK1_22_+_ 38466844_ 38466898_ 38467688_ 38467751_ 38465039_ 38465129_ 38468483 | 0.485 | Up | 2.24E-06 | 0.000503036 |
| PGAP3 | MXE | ENSG00000161395_PGAP3_17_-_ 37830869_ 37830932_ 37840849_ 37841002_ 37827374_ 37829119_ 37842174 | 0.28 | Up | 7.12E-06 | 0.001382047 |
| LGMN | MXE | ENSG00000100600_LGMN_14_-_ 93207406_ 93207524_ 93208049_ 93208204_ 93198993_ 93199160_ 93214833 | 0.524 | Up | 8.86E-06 | 0.001645266 |
| SS18 | MXE | ENSG00000141380_SS18_18_-_ 23658974_ 23659110_ 23660268_ 23660387_ 23658039_ 23658124_ 23667464 | 0.51 | Up | 1.04E-05 | 0.001858621 |
| SS18 | MXE | ENSG00000141380_SS18_18_-_ 23658974_ 23659089_ 23660268_ 23660387_ 23658039_ 23658124_ 23667464 | 0.498 | Up | 1.58E-05 | 0.002591643 |
| TOP3B | MXE | ENSG00000100038_TOP3B_22_-_ 22322990_ 22323147_ 22326248_ 22326323_ 22321974_ 22322088_ 22326983 | -0.375 | Down | 1.70E-05 | 0.002680038 |
| ANKRD30A | MXE | ENSG00000148513_ANKRD30A_10_+_ 37442499_ 37442590_ 37478394_ 37478485_ 37440987_ 37441049_ 37481991 | -0.365 | Down | 1.91E-05 | 0.002906826 |
| MIS18BP1 | MXE | ENSG00000129534_MIS18BP1_14_-_ 45701935_ 45702023_ 45705016_ 45705147_ 45700343_ 45700501_ 45706850 | -0.231 | Down | 2.63E-05 | 0.003735758 |
| CERS4 | MXE | ENSG00000090661_CERS4_19_+_ 8275589_ 8275746_ 8315927_ 8316133_ 8274209_ 8274378_ 8319382 | 0.472 | Up | 2.94E-05 | 0.004041851 |
| HDAC11 | MXE | ENSG00000163517_HDAC11_3_+_ 13524963_ 13525064_ 13543370_ 13543433_ 13522745_ 13522894_ 13544383 | -0.468 | Down | 3.30E-05 | 0.004406354 |
| BBS1 | MXE | ENSG00000174483_BBS1_11_+_ 66281876_ 66282149_ 66283010_ 66283057_ 66278675_ 66278710_ 66283163 | -0.224 | Down | 3.99E-05 | 0.005004718 |
| OSGEPL1 | MXE | ENSG00000128694_OSGEPL1_2_-_190615275_190615382_190617378_190617450_190611385_190611894_190617574 | -0.247 | Down | 5.88E-05 | 0.00697228 |
| USP13 | MXE | ENSG00000058056_USP13_3_+_179399665_179399791_179408028_179408089_179370837_179371181_179418795 | -0.25 | Down | 8.55E-05 | 0.009363459 |
| RNF115 | MXE | ENSG00000121848_RNF115_1_+_145646278_145646469_145648015_145648067_145646114_145646173_145650482 | 0.665 | Up | 8.97E-05 | 0.009577285 |
| CCDC14 | MXE | ENSG00000175455_CCDC14_3_-_123665649_123666166_123667537_123667632_123663695_123663837_123667742 | -0.235 | Down | 0.00010665 | 0.010588157 |
| UBE2J2 | MXE | ENSG00000160087_UBE2J2_1_-_ 1200162_ 1200210_ 1201477_ 1201670_ 1198725_ 1198766_ 1203241 | -0.223 | Down | 0.00012462 | 0.010639683 |
| PPAPDC1B | MXE | ENSG00000147535_PPAPDC1B_8_-_ 38125414_ 38125478_ 38125888_ 38125925_ 38124784_ 38124909_ 38126399 | -0.203 | Down | 0.00012376 | 0.010639683 |
| TTC23 | MXE | ENSG00000103852_TTC23_15_-_ 99785593_ 99785715_ 99789826_ 99790004_ 99768737_ 99768937_ 99791359 | -0.689 | Down | 0.00011892 | 0.010639683 |
| ARNTL2 | MXE | ENSG00000029153_ARNTL2_12_+_ 27523061_ 27523163_ 27529278_ 27529320_ 27521194_ 27521345_ 27533179 | -0.274 | Down | 0.00014085 | 0.011563592 |
| TAB3 | MXE | ENSG00000157625_TAB3_X_-_ 30861082_ 30861166_ 30864667_ 30864761_ 30852167_ 30852269_ 30870894 | -0.259 | Down | 0.0001479 | 0.011854621 |
| PRR5 | MXE | ENSG00000186654_PRR5_22_+_ 45110470_ 45110551_ 45121123_ 45121172_ 45098371_ 45098488_ 45122456 | 0.282 | Up | 0.00014995 | 0.011854621 |
| RANBP9 | MXE | ENSG00000010017_RANBP9_6_-_ 13644776_ 13644961_ 13652890_ 13652913_ 13641430_ 13641539_ 13657340 | 0.294 | Up | 0.00016636 | 0.012244845 |
| ZBTB8OS | MXE | ENSG00000176261_ZBTB8OS_1_-_ 33099245_ 33099328_ 33099551_ 33099673_ 33093108_ 33093145_ 33116029 | 0.205 | Up | 0.00018042 | 0.012837124 |
| MARCH8 | MXE | ENSG00000165406_MARCH8_10_-_ 45959686_ 45959775_ 45984814_ 45984865_ 45956678_ 45956859_ 46028557 | -0.331 | Down | 0.00017938 | 0.012837124 |
| TBC1D19 | MXE | ENSG00000109680_TBC1D19_4_+_ 26641762_ 26641809_ 26661218_ 26661329_ 26640392_ 26640456_ 26667954 | 0.317 | Up | 0.00019791 | 0.013850415 |
| DBR1 | MXE | ENSG00000138231_DBR1_3_-_137882619_137882700_137885922_137886147_137882190_137882336_137888948 | -0.299 | Down | 0.00020321 | 0.013991929 |
| HDAC8 | MXE | ENSG00000147099_HDAC8_X_-_ 71787738_ 71787880_ 71788603_ 71788734_ 71715005_ 71715118_ 71791906 | -0.274 | Down | 0.00021112 | 0.014219938 |
| TRDMT1 | MXE | ENSG00000107614_TRDMT1_10_-_ 17203481_ 17203547_ 17210839_ 17210916_ 17202303_ 17202373_ 17216549 | 0.426 | Up | 0.00025639 | 0.01644909 |
| DENND2C | MXE | ENSG00000175984_DENND2C_1_-_115164515_115164686_115165607_115165720_115161006_115161103_115166127 | 0.364 | Up | 0.00025816 | 0.01644909 |
| PUS7 | MXE | ENSG00000091127_PUS7_7_-_105111134_105111295_105112578_105112640_105108783_105108910_105121498 | -0.229 | Down | 0.00030585 | 0.018777486 |
| MGLL | MXE | ENSG00000074416_MGLL_3_-_127413817_127414033_127429418_127429508_127410959_127411166_127439895 | -0.46 | Down | 0.00035038 | 0.020774724 |
| C20orf96 | MXE | ENSG00000196476_C20orf96_20_-_ 256608_ 256727_ 257433_ 257520_ 251503_ 251908_ 257684 | 0.248 | Up | 0.00036922 | 0.021591902 |
| PTPN20B | MXE | ENSG00000183675_PTPN20B_10_-_ 48754797_ 48755132_ 48774224_ 48774376_ 48751806_ 48752022_ 48792686 | 0.33 | Up | 0.00042248 | 0.023371924 |
| UBE2F | MXE | ENSG00000184182_UBE2F_2_+_238881733_238881867_238925207_238925275_238875721_238875774_238933982 | -0.226 | Down | 0.00043858 | 0.023403865 |
| ZNF415 | MXE | ENSG00000170954_ZNF415_19_-_ 53625656_ 53625865_ 53625914_ 53625996_ 53619565_ 53619686_ 53636108 | -0.258 | Down | 0.00043849 | 0.023403865 |
| TMEM164 | MXE | ENSG00000157600_TMEM164_X_+_109246728_109247392_109310574_109310624_109246322_109246384_109352307 | -0.286 | Down | 0.00047197 | 0.024571047 |
| ASAP1 | MXE | ENSG00000153317_ASAP1_8_-_131249167_131249240_131370262_131370389_131226801_131226947_131414130 | -0.249 | Down | 0.00053309 | 0.026901602 |
| IST1 | MXE | ENSG00000182149_IST1_16_+_ 71957190_ 71957283_ 71958675_ 71958720_ 71956376_ 71956583_ 71961516 | 0.24 | Up | 0.00056452 | 0.027385756 |
| ZFAND2B | MXE | ENSG00000158552_ZFAND2B_2_+_220072608_220072760_220072977_220073070_220072369_220072501_220073147 | -0.35 | Down | 0.00057947 | 0.027795101 |
| SLC30A6 | MXE | ENSG00000152683_SLC30A6_2_+_ 32431954_ 32432002_ 32434561_ 32434630_ 32429658_ 32429761_ 32445281 | -0.248 | Down | 0.00064298 | 0.02983553 |
| SRSF11 | MXE | ENSG00000116754_SRSF11_1_+_ 70696777_ 70696886_ 70697541_ 70697658_ 70694104_ 70694238_ 70697950 | 0.339 | Up | 0.00070528 | 0.032030422 |
| OVGP1 | MXE | ENSG00000085465_OVGP1_1_-_111963897_111964083_111964186_111964295_111962231_111962348_111965548 | 0.279 | Up | 0.00073368 | 0.032626054 |
| TNRC6A | MXE | ENSG00000090905_TNRC6A_16_+_ 24741573_ 24741621_ 24788253_ 24788679_ 24741033_ 24741167_ 24800552 | 0.295 | Up | 0.0007321 | 0.032626054 |
| SUN1 | MXE | ENSG00000164828_SUN1_7_+_ 888054_ 888252_ 889559_ 889670_ 882977_ 883157_ 891020 | 0.237 | Up | 0.00075666 | 0.033300692 |
| BOK | MXE | ENSG00000176720_BOK_2_+_242501762_242501891_242509539_242509703_242498135_242498408_242511711 | 0.21 | Up | 0.00087645 | 0.035634117 |
| BORA | MXE | ENSG00000136122_BORA_13_+_ 73303063_ 73303231_ 73305418_ 73305525_ 73302060_ 73302145_ 73309097 | -0.401 | Down | 0.00108846 | 0.040760108 |
| GUK1 | MXE | ENSG00000143774_GUK1_1_+_228333713_228333768_228334542_228334639_228333211_228333325_228335315 | 0.291 | Up | 0.00111033 | 0.041217334 |
| ADAM15 | MXE | ENSG00000143537_ADAM15_1_+_155033893_155033965_155034379_155034593_155033238_155033308_155034720 | -0.433 | Down | 0.00126144 | 0.0449702 |
| ICA1L | MXE | ENSG00000163596_ICA1L_2_-_203653552_203653810_203661612_203661687_203650640_203650730_203676468 | 0.243 | Up | 0.00124726 | 0.0449702 |
| DAG1 | MXE | ENSG00000173402_DAG1_3_+_ 49508397_ 49508482_ 49530255_ 49530406_ 49507564_ 49507866_ 49547851 | 0.253 | Up | 0.0012641 | 0.0449702 |
| XPNPEP1 | MXE | ENSG00000108039_XPNPEP1_10_-_111652769_111652833_111667448_111667573_111651479_111651584_111674768 | 0.206 | Up | 0.00127955 | 0.045143644 |
| ZNF467 | MXE | ENSG00000181444_ZNF467_7_-_149466178_149466289_149467528_149467645_149461451_149463328_149468087 | 0.239 | Up | 0.00135433 | 0.046252954 |
| SLC3A2 | MXE | ENSG00000168003_SLC3A2_11_+_ 62649976_ 62650090_ 62650138_ 62650279_ 62649170_ 62649538_ 62650379 | -0.285 | Down | 0.00138134 | 0.046432492 |
| TMEM241 | MXE | ENSG00000134490_TMEM241_18_-_ 20936557_ 20936627_ 20950179_ 20950225_ 20889643_ 20889708_ 20951385 | 0.365 | Up | 0.00137078 | 0.046432492 |

**Supplementary Table 12: Alternatively spliced events list.** Full list of alternative splicing events. Table indicates whether these events occurred either more (up) or less (down) frequently in LNCaP95 PC cells treated with JMJD6 siRNA compared to non-targeting control siRNA. SE = skipped exon, A3SS = alternative 3’ splice site, A5SS = alternative 5’ splice site, RI = retained intron, MXE = mutually exclusive exons.
